# Supplementary material
Source: publisher figshare collection journal article supplement (https://sage.figshare.com/ndownloader/files/17947784)
Supplement: Supplementary file 1 [file 17947784]

congress,time,ICPSR_ID,name,ICPSR_state,state_name,party,FP_position,DW_NOM1,SASC,SFRC,GOP_prez_share,female,veteran
103,1,1366,"BYRD, Robert Carlyle",56,WEST VI,100,-0.252711489,-0.309,1,0,0.422311619,0,0
103,1,4812,"INOUYE, Daniel Ken",82,HAWAII,100,-0.479390707,-0.319,0,0,0.432800223,0,1
103,1,9369,"THURMOND, James Strom",48,SOUTH C,200,0.942199291,0.391,1,0,0.546353384,0,1
103,1,10513,"DOLE, Robert Joseph",32,KANSAS,200,1.269035486,0.322,0,0,0.535410556,0,1
103,1,10791,"PRYOR, David Hampton",42,ARKANSA,100,-0.862209148,-0.322,0,0,0.400077329,0,0
103,1,10808,"KENNEDY, Edward Moore (Ted)",3,MASSACH,100,-0.813030933,-0.443,1,0,0.379076532,0,1
103,1,10818,"PELL, Claiborne de Borda",5,RHODE I,100,-1.258629367,-0.332,0,1,0.381562772,0,1
103,1,11043,"RIEGLE, Donald Wayne, Jr.",23,MICHIGA,100,-0.779051425,-0.426,0,0,0.453848404,0,0
103,1,11044,"ROTH, William Victor, Jr.",11,DELAWAR,200,0.841235583,0.272,0,0,0.448020073,0,1
103,1,11203,"HATFIELD, Mark Odom",72,OREGON,200,-0.282855751,0.056,0,0,0.433661085,0,1
103,1,11204,"HOLLINGS, Ernest Frederick",48,SOUTH C,100,-0.242700717,-0.293,0,0,0.546353384,0,1
103,1,12107,"PACKWOOD, Robert William",72,OREGON,200,0.242051639,0.135,0,0,0.433661085,0,0
103,1,12109,"STEVENS, Theodore Fulton (Ted)",81,ALASKA,200,0.789762559,0.219,0,0,0.56574262,0,1
103,1,13039,"SARBANES, Paul Spyros",52,MARYLAN,100,-1.186130505,-0.435,0,1,0.417001,0,0
103,1,13056,"BREAUX, John Berlinger",45,LOUISIA,100,-0.356045725,-0.123,0,0,0.473348621,0,0
103,1,14009,"COCHRAN, William Thad",46,MISSISS,200,0.600357827,0.286,0,0,0.549284895,0,1
103,1,14010,"COHEN, William Sebastian",2,MAINE,200,0.628155579,0.1,1,0,0.439441271,0,0
103,1,14031,"LOTT, Chester Trent",46,MISSISS,200,1.395125926,0.39,1,0,0.549284895,0,0
103,1,14073,"METZENBAUM, Howard Morton",24,OHIO,100,-1.301599249,-0.492,0,0,0.488318367,0,0
103,1,14101,"BIDEN, Joseph Robinette, Jr.",11,DELAWAR,100,-0.739898133,-0.314,0,1,0.448020073,0,0
103,1,14103,"DOMENICI, Pete Vichi",66,NEW MEX,200,0.611319501,0.257,0,0,0.448578432,0,0
103,1,14105,"HELMS, Jesse",47,NORTH C,200,1.79510674,0.631,0,1,0.504584643,0,1
103,1,14107,"JOHNSTON, John Bennett, Jr.",45,LOUISIA,100,-0.42555665,-0.192,0,0,0.473348621,0,1
103,1,14108,"NUNN, Samuel Augustus",44,GEORGIA,100,-0.129630963,-0.145,1,0,0.496578715,0,1
103,1,14203,"BAUCUS, Max Sieben",64,MONTANA,100,-0.563382581,-0.212,0,0,0.482759429,0,0
103,1,14213,"DODD, Christopher John",1,CONNECT,100,-0.558336378,-0.328,0,1,0.458748833,0,1
103,1,14226,"GRASSLEY, Charles Ernest",31,IOWA,200,0.472612012,0.341,0,0,0.462674709,0,0
103,1,14230,"HARKIN, Thomas Richard (Tom)",31,IOWA,100,-1.211588337,-0.351,0,0,0.462674709,0,1
103,1,14240,"JEFFORDS, James Merrill",6,VERMONT,200,-0.155619349,0.014,0,1,0.397457986,0,1
103,1,14247,"KRUEGER, Robert Charles",49,TEXAS,100,-0.106688195,-0.117,0,0,0.522421632,0,0
103,1,14268,"PRESSLER, Larry Lee",37,SOUTH D,200,1.108109389,0.213,0,1,0.522610338,0,1
103,1,14275,"SIMON, Paul Martin",21,ILLINOI,100,-1.245138639,-0.397,0,1,0.414117818,0,1
103,1,14300,"BUMPERS, Dale",42,ARKANSA,100,-0.951751054,-0.362,0,0,0.400077329,0,1
103,1,14302,"FORD, Wendell Hampton",51,KENTUCK,100,-0.359655796,-0.277,0,0,0.481312223,0,1
103,1,14304,"GLENN, John Herschel, Jr.",24,OHIO,100,-0.554498027,-0.262,1,0,0.488318367,0,1
103,1,14307,"LEAHY, Patrick Joseph",6,VERMONT,100,-1.109990282,-0.375,0,0,0.397457986,0,0
103,1,14400,"AKAKA, Daniel Kahikina",82,HAWAII,100,-0.725200166,-0.419,0,0,0.432800223,0,1
103,1,14440,"MIKULSKI, Barbara Ann",52,MARYLAN,100,-0.742177511,-0.37,0,0,0.417001,1,0
103,1,14500,"CHAFEE, John Hubbard",5,RHODE I,200,-0.111956581,0.084,0,0,0.381562772,0,1
103,1,14501,"DANFORTH, John Claggett",34,MISSOUR,200,0.302139333,0.196,0,0,0.434930339,0,0
103,1,14502,"DeCONCINI, Dennis Webster",61,ARIZONA,100,-0.523206968,-0.216,0,0,0.51301904,0,1
103,1,14503,"HATCH, Orrin Grant",67,UTAH,200,0.92885461,0.382,0,0,0.637535791,0,0
103,1,14506,"LUGAR, Richard Green",22,INDIANA,200,0.598437764,0.304,0,1,0.538348945,0,1
103,1,14508,"MOYNIHAN, Daniel Patrick",13,NEW YOR,100,-0.939495243,-0.301,0,1,0.405216523,0,1
103,1,14509,"SASSER, James Ralph",54,TENNESS,100,-0.531452716,-0.355,0,0,0.474019634,0,1
103,1,14511,"WALLOP, Malcolm",68,WYOMING,200,1.68968091,0.575,0,0,0.537920234,0,1
103,1,14617,"DASCHLE, Thomas Andrew",37,SOUTH D,100,-0.955527168,-0.303,0,0,0.522610338,0,1
103,1,14628,"GRAMM, William Philip (Phil)",49,TEXAS,200,0.811382792,0.551,0,0,0.522421632,0,0
103,1,14659,"SHELBY, Richard C.",41,ALABAMA,100,0.187696278,0.013,1,0,0.538211265,0,0
103,1,14700,"BOREN, David Lyle",53,OKLAHOM,100,-0.558317714,-0.142,0,0,0.556221183,0,1
103,1,14702,"BRADLEY, William Warren (Bill)",12,NEW JER,100,-0.564296219,-0.313,0,0,0.485796816,0,1
103,1,14703,"DURENBERGER, David Ferdinand",33,MINNESO,200,0.044440558,0.115,0,0,0.422786598,0,1
103,1,14704,"EXON, J. James",35,NEBRASK,100,-0.260456238,-0.214,1,0,0.613053464,0,1
103,1,14705,"HEFLIN, Howell Thomas",41,ALABAMA,100,0.029021228,-0.095,0,0,0.538211265,0,1
103,1,14708,"KASSEBAUM, Nancy Landon",32,KANSAS,200,0.130300809,0.2,0,1,0.535410556,1,0
103,1,14709,"LEVIN, Carl",23,MICHIGA,100,-0.611115154,-0.395,1,0,0.453848404,0,0
103,1,14710,"SIMPSON, Alan Kooi",68,WYOMING,200,0.880380761,0.322,0,0,0.537920234,0,1
103,1,14712,"WARNER, John William",40,VIRGINI,200,0.326376309,0.262,1,0,0.525550129,0,1
103,1,14713,"MITCHELL, George John",2,MAINE,100,-1.017972749,-0.347,0,0,0.439441271,0,1
103,1,14803,"BROWN, George Hanks (Hank)",62,COLORAD,200,0.930829864,0.511,0,1,0.471979345,0,1
103,1,14806,"COATS, Daniel Ray",22,INDIANA,200,0.771297238,0.375,1,0,0.538348945,0,1
103,1,14809,"CRAIG, Larry Edwin",63,IDAHO,200,2.151439,0.494,0,0,0.59661483,0,1
103,1,14812,"DORGAN, Byron Leslie",36,NORTH D,100,-0.694643499,-0.267,0,0,0.578747048,0,0
103,1,14826,"GREGG, Judd Alan",4,NEW HAM,200,0.798490818,0.429,0,0,0.492034486,0,0
103,1,14900,"D'AMATO, Alfonse Marcello",13,NEW YOR,200,0.930269636,0.182,0,0,0.405216523,0,0
103,1,14904,"GORTON, Thomas Slade, III (Slade)",73,WASHING,200,1.026687235,0.271,0,0,0.424082989,0,1
103,1,14907,"MURKOWSKI, Frank Hughes",81,ALASKA,200,0.694907392,0.346,0,1,0.56574262,0,1
103,1,14908,"NICKLES, Donald Lee",53,OKLAHOM,200,0.978404195,0.52,0,0,0.556221183,0,0
103,1,14910,"SPECTER, Arlen",14,PENNSYL,200,0.159049434,0.068,0,0,0.444514705,0,1
103,1,14912,"BINGAMAN, Jesse Francis, Jr. (Jeff)",66,NEW MEX,100,-0.570458404,-0.266,1,0,0.448578432,0,1
103,1,14914,"LAUTENBERG, Frank Raleigh",12,NEW JER,100,-0.560182553,-0.382,0,0,0.485796816,0,1
103,1,14920,"KERRY, John Forbes",3,MASSACH,100,-0.759944283,-0.352,0,1,0.379076532,0,1
103,1,14921,"McCONNELL, Addison Mitchell (Mitch)",51,KENTUCK,200,0.539966772,0.404,0,0,0.481312223,0,1
103,1,14922,"ROCKEFELLER, John Davison IV (Jay)",56,WEST VI,100,-0.749210973,-0.326,0,0,0.422311619,0,0
103,1,15011,"BOXER, Barbara",71,CALIFOR,100,-0.755947765,-0.45,0,0,0.414832712,1,0
103,1,15037,"MACK, Connie, III",43,FLORIDA,200,0.690544278,0.466,0,0,0.511847834,0,0
103,1,15039,"McCAIN, John Sidney, III",61,ARIZONA,200,0.834434744,0.381,1,0,0.51301904,0,1
103,1,15054,"REID, Harry",65,NEVADA,100,-0.510110258,-0.276,0,0,0.481752225,0,0
103,1,15116,"SMITH, Robert C.",4,NEW HAM,200,2.144996321,0.623,1,0,0.492034486,0,1
103,1,15407,"CAMPBELL, Ben Nighthorse",62,COLORAD,100,-0.377780282,-0.141,0,0,0.471979345,0,1
103,1,15424,"INHOFE, James Mountain",53,OKLAHOM,200,1.995324365,0.551,0,0,0.556221183,0,1
103,1,15501,"BOND, Christopher Samuel (Kit)",34,MISSOUR,200,0.523567073,0.31,0,0,0.434930339,0,0
103,1,15502,"CONRAD, Kent",36,NORTH D,100,-0.64146177,-0.296,0,0,0.578747048,0,0
103,1,15503,"GRAHAM, Daniel Robert (Bob)",43,FLORIDA,100,-0.329597224,-0.231,1,0,0.511847834,0,0
103,1,15700,"BRYAN, Richard H",65,NEVADA,100,-0.43922647,-0.241,0,0,0.481752225,0,1
103,1,15701,"BURNS, Conrad",64,MONTANA,200,0.533715823,0.361,0,0,0.482759429,0,1
103,1,15702,"KERREY, J. Robert",35,NEBRASK,100,-0.718156748,-0.223,0,0,0.613053464,0,1
103,1,15703,"KOHL, Herbert H.",25,WISCONS,100,-0.378462445,-0.256,0,0,0.472054915,0,1
103,1,15704,"LIEBERMAN, Joseph I.",1,CONNECT,100,-0.026050632,-0.205,1,0,0.458748833,0,0
103,1,15705,"ROBB, Charles Spittal",40,VIRGINI,100,-0.19475901,-0.2,1,1,0.525550129,0,1
103,1,49101,"WELLSTONE, Paul David",33,MINNESO,100,-1.019914343,-0.583,0,0,0.422786598,0,0
103,1,49104,"WOFFORD, Harris",14,PENNSYL,100,-0.950159687,-0.334,0,1,0.444514705,0,0
103,1,49300,"FEINSTEIN, Dianne",71,CALIFOR,100,-0.514149501,-0.263,0,0,0.414832712,1,0
103,1,49301,"COVERDELL, Paul",44,GEORGIA,200,0.861141821,0.407,0,1,0.496578715,0,1
103,1,49302,"KEMPTHORNE, Dirk",63,IDAHO,200,2.158925057,0.46,1,0,0.59661483,0,0
103,1,49303,"MOSELEY BRAUN, Carol",21,ILLINOI,100,-0.886591706,-0.335,0,0,0.414117818,1,0
103,1,49304,"FAIRCLOTH, Duncan McLauchlin (Lauch)",47,NORTH C,200,1.533313894,0.709,1,0,0.504584643,0,0
103,1,49305,"MATHEWS, Harlan",54,TENNESS,100,-0.735178109,-0.324,0,1,0.474019634,0,1
103,1,49306,"HUTCHISON, Kathryn Ann Bailey (Kay)",49,TEXAS,200,0.948971599,0.356,1,1,0.522421632,1,0
103,1,49307,"BENNETT, Robert",67,UTAH,200,0.90539476,0.331,0,0,0.637535791,0,1
103,1,49308,"MURRAY, Patty",73,WASHING,100,-1.224064813,-0.342,0,0,0.424082989,1,0
103,1,49309,"FEINGOLD, Russell Dana",25,WISCONS,100,-0.479488925,-0.308,0,1,0.472054915,0,0
104,2,1366,"BYRD, Robert Carlyle",56,WEST VI,100,-0.596696194,-0.309,1,0,0.422311619,0,0
104,2,4812,"INOUYE, Daniel Ken",82,HAWAII,100,-0.36774073,-0.319,0,0,0.432800223,0,1
104,2,9369,"THURMOND, James Strom",48,SOUTH C,200,1.694754813,0.391,1,0,0.546353384,0,1
104,2,10513,"DOLE, Robert Joseph",32,KANSAS,200,1.39383996,0.322,0,0,0.535410556,0,1
104,2,10791,"PRYOR, David Hampton",42,ARKANSA,100,-1.057595169,-0.322,0,0,0.400077329,0,0
104,2,10808,"KENNEDY, Edward Moore (Ted)",3,MASSACH,100,-1.356304992,-0.443,1,0,0.379076532,0,1
104,2,10818,"PELL, Claiborne de Borda",5,RHODE I,100,-0.815913987,-0.332,0,1,0.381562772,0,1
104,2,11044,"ROTH, William Victor, Jr.",11,DELAWAR,200,0.47344341,0.272,0,0,0.448020073,0,1
104,2,11203,"HATFIELD, Mark Odom",72,OREGON,200,-0.321633108,0.056,0,0,0.433661085,0,1
104,2,11204,"HOLLINGS, Ernest Frederick",48,SOUTH C,100,-0.189075996,-0.293,0,0,0.546353384,0,1
104,2,12107,"PACKWOOD, Robert William",72,OREGON,200,0.640873549,0.135,0,0,0.433661085,0,0
104,2,12109,"STEVENS, Theodore Fulton (Ted)",81,ALASKA,200,0.749461656,0.219,0,0,0.56574262,0,1
104,2,13039,"SARBANES, Paul Spyros",52,MARYLAN,100,-1.191153296,-0.435,0,1,0.417001,0,0
104,2,13056,"BREAUX, John Berlinger",45,LOUISIA,100,-0.38552123,-0.123,0,0,0.473348621,0,0
104,2,14009,"COCHRAN, William Thad",46,MISSISS,200,1.265554345,0.286,0,0,0.549284895,0,1
104,2,14010,"COHEN, William Sebastian",2,MAINE,200,0.565350496,0.1,1,0,0.439441271,0,0
104,2,14031,"LOTT, Chester Trent",46,MISSISS,200,1.742985177,0.39,1,0,0.549284895,0,0
104,2,14101,"BIDEN, Joseph Robinette, Jr.",11,DELAWAR,100,-0.671536241,-0.314,0,1,0.448020073,0,0
104,2,14103,"DOMENICI, Pete Vichi",66,NEW MEX,200,0.903363465,0.257,0,0,0.448578432,0,0
104,2,14105,"HELMS, Jesse",47,NORTH C,200,2.677998972,0.631,0,1,0.504584643,0,1
104,2,14107,"JOHNSTON, John Bennett, Jr.",45,LOUISIA,100,-0.402700148,-0.192,0,0,0.473348621,0,1
104,2,14108,"NUNN, Samuel Augustus",44,GEORGIA,100,-0.269196504,-0.145,1,0,0.496578715,0,1
104,2,14203,"BAUCUS, Max Sieben",64,MONTANA,100,-0.540379006,-0.212,0,0,0.482759429,0,0
104,2,14213,"DODD, Christopher John",1,CONNECT,100,-0.766422172,-0.328,0,1,0.458748833,0,1
104,2,14226,"GRASSLEY, Charles Ernest",31,IOWA,200,0.263047885,0.341,0,0,0.462674709,0,0
104,2,14230,"HARKIN, Thomas Richard (Tom)",31,IOWA,100,-1.134110376,-0.351,0,0,0.462674709,0,1
104,2,14240,"JEFFORDS, James Merrill",6,VERMONT,200,-0.196389196,0.014,0,0,0.397457986,0,1
104,2,14268,"PRESSLER, Larry Lee",37,SOUTH D,200,0.734584362,0.213,0,0,0.522610338,0,1
104,2,14275,"SIMON, Paul Martin",21,ILLINOI,100,-1.744260814,-0.397,0,0,0.414117818,0,1
104,2,14300,"BUMPERS, Dale",42,ARKANSA,100,-1.139069069,-0.362,0,0,0.400077329,0,1
104,2,14302,"FORD, Wendell Hampton",51,KENTUCK,100,-0.423385753,-0.277,0,0,0.481312223,0,1
104,2,14304,"GLENN, John Herschel, Jr.",24,OHIO,100,-0.875831544,-0.262,1,0,0.488318367,0,1
104,2,14307,"LEAHY, Patrick Joseph",6,VERMONT,100,-1.344193471,-0.375,0,0,0.397457986,0,0
104,2,14400,"AKAKA, Daniel Kahikina",82,HAWAII,100,-0.928136784,-0.419,0,0,0.432800223,0,1
104,2,14440,"MIKULSKI, Barbara Ann",52,MARYLAN,100,-0.690353198,-0.37,0,0,0.417001,1,0
104,2,14500,"CHAFEE, John Hubbard",5,RHODE I,200,0.073544058,0.084,0,0,0.381562772,0,1
104,2,14503,"HATCH, Orrin Grant",67,UTAH,200,1.27704517,0.382,0,0,0.637535791,0,0
104,2,14506,"LUGAR, Richard Green",22,INDIANA,200,0.398304971,0.304,0,1,0.538348945,0,1
104,2,14508,"MOYNIHAN, Daniel Patrick",13,NEW YOR,100,-1.158170677,-0.301,0,0,0.405216523,0,1
104,2,14617,"DASCHLE, Thomas Andrew",37,SOUTH D,100,-1.083385258,-0.303,0,0,0.522610338,0,1
104,2,14628,"GRAMM, William Philip (Phil)",49,TEXAS,200,1.020050181,0.551,0,0,0.522421632,0,0
104,2,14661,"SNOWE, Olympia Jean",2,MAINE,200,0.364322369,0.091,0,1,0.439441271,1,0
104,2,14702,"BRADLEY, William Warren (Bill)",12,NEW JER,100,-0.887066621,-0.313,0,0,0.485796816,0,1
104,2,14704,"EXON, J. James",35,NEBRASK,100,-0.535626963,-0.214,1,0,0.613053464,0,1
104,2,14705,"HEFLIN, Howell Thomas",41,ALABAMA,100,-0.027635677,-0.095,0,0,0.538211265,0,1
104,2,14708,"KASSEBAUM, Nancy Landon",32,KANSAS,200,0.138574879,0.2,0,1,0.535410556,1,0
104,2,14709,"LEVIN, Carl",23,MICHIGA,100,-1.135327076,-0.395,1,0,0.453848404,0,0
104,2,14710,"SIMPSON, Alan Kooi",68,WYOMING,200,0.591988962,0.322,0,0,0.537920234,0,1
104,2,14712,"WARNER, John William",40,VIRGINI,200,1.576000772,0.262,1,0,0.525550129,0,1
104,2,14803,"BROWN, George Hanks (Hank)",62,COLORAD,200,0.182145752,0.511,0,1,0.471979345,0,1
104,2,14806,"COATS, Daniel Ray",22,INDIANA,200,1.426694313,0.375,1,0,0.538348945,0,1
104,2,14809,"CRAIG, Larry Edwin",63,IDAHO,200,2.345705348,0.494,0,0,0.59661483,0,1
104,2,14812,"DORGAN, Byron Leslie",36,NORTH D,100,-0.882890979,-0.267,0,0,0.578747048,0,0
104,2,14826,"GREGG, Judd Alan",4,NEW HAM,200,0.459721318,0.429,0,0,0.492034486,0,0
104,2,14871,"WYDEN, Ronald Lee",72,OREGON,100,-1.247168065,-0.314,0,0,0.433661085,0,0
104,2,14900,"D'AMATO, Alfonse Marcello",13,NEW YOR,200,1.004492203,0.182,0,0,0.405216523,0,0
104,2,14904,"GORTON, Thomas Slade, III (Slade)",73,WASHING,200,1.024571223,0.271,0,0,0.424082989,0,1
104,2,14907,"MURKOWSKI, Frank Hughes",81,ALASKA,200,1.395031496,0.346,0,0,0.56574262,0,1
104,2,14908,"NICKLES, Donald Lee",53,OKLAHOM,200,1.924035357,0.52,0,0,0.556221183,0,0
104,2,14910,"SPECTER, Arlen",14,PENNSYL,200,0.199309626,0.068,0,0,0.444514705,0,1
104,2,14912,"BINGAMAN, Jesse Francis, Jr. (Jeff)",66,NEW MEX,100,-0.827002593,-0.266,1,0,0.448578432,0,1
104,2,14914,"LAUTENBERG, Frank Raleigh",12,NEW JER,100,-1.069502771,-0.382,0,0,0.485796816,0,1
104,2,14920,"KERRY, John Forbes",3,MASSACH,100,-1.105507973,-0.352,0,1,0.379076532,0,1
104,2,14921,"McCONNELL, Addison Mitchell (Mitch)",51,KENTUCK,200,1.113680474,0.404,0,0,0.481312223,0,1
104,2,14922,"ROCKEFELLER, John Davison IV (Jay)",56,WEST VI,100,-0.936451003,-0.326,0,0,0.422311619,0,0
104,2,15011,"BOXER, Barbara",71,CALIFOR,100,-1.19948685,-0.45,0,0,0.414832712,1,0
104,2,15020,"DeWINE, Michael",24,OHIO,200,0.673109441,0.289,0,0,0.488318367,0,0
104,2,15037,"MACK, Connie, III",43,FLORIDA,200,0.639617877,0.466,0,0,0.511847834,0,0
104,2,15039,"McCAIN, John Sidney, III",61,ARIZONA,200,0.341939929,0.381,1,0,0.51301904,0,1
104,2,15054,"REID, Harry",65,NEVADA,100,-0.462602327,-0.276,0,0,0.481752225,0,0
104,2,15116,"SMITH, Robert C.",4,NEW HAM,200,2.030004171,0.623,1,0,0.492034486,0,1
104,2,15407,"CAMPBELL, Ben Nighthorse",62,COLORAD,100,-0.105641967,-0.141,0,0,0.471979345,0,1
104,2,15424,"INHOFE, James Mountain",53,OKLAHOM,200,2.643734458,0.551,1,0,0.556221183,0,1
104,2,15429,"KYL, Jon Llewellyn",61,ARIZONA,200,1.06020543,0.548,0,0,0.51301904,0,0
104,2,15501,"BOND, Christopher Samuel (Kit)",34,MISSOUR,200,0.828795159,0.31,0,0,0.434930339,0,0
104,2,15502,"CONRAD, Kent",36,NORTH D,100,-0.816662515,-0.296,0,0,0.578747048,0,0
104,2,15503,"GRAHAM, Daniel Robert (Bob)",43,FLORIDA,100,-0.708512078,-0.231,0,0,0.511847834,0,0
104,2,15633,"THOMAS, Craig Lyle",68,WYOMING,200,1.146445975,0.446,0,1,0.537920234,0,1
104,2,15700,"BRYAN, Richard H",65,NEVADA,100,-0.513479294,-0.241,1,0,0.481752225,0,1
104,2,15701,"BURNS, Conrad",64,MONTANA,200,1.254258991,0.361,0,0,0.482759429,0,1
104,2,15702,"KERREY, J. Robert",35,NEBRASK,100,-0.84779408,-0.223,0,0,0.613053464,0,1
104,2,15703,"KOHL, Herbert H.",25,WISCONS,100,-0.949006216,-0.256,0,0,0.472054915,0,1
104,2,15704,"LIEBERMAN, Joseph I.",1,CONNECT,100,-0.237171775,-0.205,1,0,0.458748833,0,0
104,2,15705,"ROBB, Charles Spittal",40,VIRGINI,100,-0.342868169,-0.2,1,1,0.525550129,0,1
104,2,29141,"SANTORUM, Richard John (Rick)",14,PENNSYL,200,1.380297502,0.338,1,0,0.444514705,0,0
104,2,29367,"GRAMS, Rod",33,MINNESO,200,1.419734298,0.506,0,1,0.422786598,0,0
104,2,49101,"WELLSTONE, Paul David",33,MINNESO,100,-1.509104882,-0.583,0,0,0.422786598,0,0
104,2,49300,"FEINSTEIN, Dianne",71,CALIFOR,100,-0.478226001,-0.263,0,1,0.414832712,1,0
104,2,49301,"COVERDELL, Paul",44,GEORGIA,200,1.414308516,0.407,0,1,0.496578715,0,1
104,2,49302,"KEMPTHORNE, Dirk",63,IDAHO,200,2.260252323,0.46,1,0,0.59661483,0,0
104,2,49303,"MOSELEY BRAUN, Carol",21,ILLINOI,100,-1.440630365,-0.335,0,0,0.414117818,1,0
104,2,49304,"FAIRCLOTH, Duncan McLauchlin (Lauch)",47,NORTH C,200,2.925273774,0.709,0,0,0.504584643,0,0
104,2,49306,"HUTCHISON, Kathryn Ann Bailey (Kay)",49,TEXAS,200,1.310028231,0.356,1,0,0.522421632,1,0
104,2,49307,"BENNETT, Robert",67,UTAH,200,0.841647662,0.331,0,0,0.637535791,0,1
104,2,49308,"MURRAY, Patty",73,WASHING,100,-1.195923746,-0.342,0,0,0.424082989,1,0
104,2,49309,"FEINGOLD, Russell Dana",25,WISCONS,100,-1.029509279,-0.308,0,1,0.472054915,0,0
104,2,49500,"ABRAHAM, Spencer",23,MICHIGA,200,0.7588853,0.311,0,0,0.453848404,0,0
104,2,49501,"ASHCROFT, John David",34,MISSOUR,200,1.959315802,0.536,0,1,0.434930339,0,0
104,2,49502,"FRIST, William H.",54,TENNESS,200,1.176114629,0.366,0,0,0.474019634,0,0
104,2,49503,"THOMPSON, Fred Dalton",54,TENNESS,200,1.35075135,0.403,0,1,0.474019634,0,0
104,2,49504,"FRAHM, Sheila",32,KANSAS,200,1.571561514,0.492,1,0,0.535410556,1,0
104,2,94659,"SHELBY, Richard C.",41,ALABAMA,200,1.346867163,0.433,0,0,0.538211265,0,0
104,2,95407,"CAMPBELL, Ben Nighthorse",62,COLORAD,200,0.576951485,0.23,0,0,0.471979345,0,1
105,3,1366,"BYRD, Robert Carlyle",56,WEST VI,100,-0.851648148,-0.309,1,0,0.416453348,0,0
105,3,4812,"INOUYE, Daniel Ken",82,HAWAII,100,-0.294825198,-0.319,0,0,0.357238482,0,1
105,3,9369,"THURMOND, James Strom",48,SOUTH C,200,1.477232045,0.391,1,0,0.532207156,0,1
105,3,10808,"KENNEDY, Edward Moore (Ted)",3,MASSACH,100,-1.614806849,-0.443,1,0,0.313601646,0,1
105,3,11044,"ROTH, William Victor, Jr.",11,DELAWAR,200,0.293161957,0.272,0,0,0.413763434,0,1
105,3,11204,"HOLLINGS, Ernest Frederick",48,SOUTH C,100,-0.335489244,-0.293,0,0,0.532207156,0,1
105,3,12109,"STEVENS, Theodore Fulton (Ted)",81,ALASKA,200,0.402339124,0.219,0,0,0.604285025,0,1
105,3,13039,"SARBANES, Paul Spyros",52,MARYLAN,100,-1.486740327,-0.435,0,1,0.413615765,0,0
105,3,13056,"BREAUX, John Berlinger",45,LOUISIA,100,-0.515431826,-0.123,0,0,0.434391617,0,0
105,3,14009,"COCHRAN, William Thad",46,MISSISS,200,0.361545282,0.286,0,0,0.527472238,0,1
105,3,14031,"LOTT, Chester Trent",46,MISSISS,200,1.273450326,0.39,0,0,0.527472238,0,0
105,3,14101,"BIDEN, Joseph Robinette, Jr.",11,DELAWAR,100,-1.042228127,-0.314,0,1,0.413763434,0,0
105,3,14103,"DOMENICI, Pete Vichi",66,NEW MEX,200,0.592365785,0.257,0,0,0.459758694,0,0
105,3,14105,"HELMS, Jesse",47,NORTH C,200,2.319262902,0.631,0,1,0.525299867,0,1
105,3,14203,"BAUCUS, Max Sieben",64,MONTANA,100,-0.641222237,-0.212,0,0,0.516874105,0,0
105,3,14213,"DODD, Christopher John",1,CONNECT,100,-0.70664467,-0.328,0,1,0.396364931,0,1
105,3,14226,"GRASSLEY, Charles Ernest",31,IOWA,200,1.461540669,0.341,0,0,0.442666111,0,0
105,3,14230,"HARKIN, Thomas Richard (Tom)",31,IOWA,100,-2.115367662,-0.351,0,0,0.442666111,0,1
105,3,14240,"JEFFORDS, James Merrill",6,VERMONT,200,-0.085196912,0.014,0,0,0.368171696,0,1
105,3,14300,"BUMPERS, Dale",42,ARKANSA,100,-1.733193698,-0.362,0,0,0.406471751,0,1
105,3,14302,"FORD, Wendell Hampton",51,KENTUCK,100,-0.41566448,-0.277,0,0,0.494709488,0,1
105,3,14304,"GLENN, John Herschel, Jr.",24,OHIO,100,-0.935029718,-0.262,1,0,0.464030508,0,1
105,3,14307,"LEAHY, Patrick Joseph",6,VERMONT,100,-1.501408598,-0.375,0,0,0.368171696,0,0
105,3,14400,"AKAKA, Daniel Kahikina",82,HAWAII,100,-0.526587815,-0.419,0,0,0.357238482,0,1
105,3,14440,"MIKULSKI, Barbara Ann",52,MARYLAN,100,-1.081861847,-0.37,0,0,0.413615765,1,0
105,3,14500,"CHAFEE, John Hubbard",5,RHODE I,200,0.030423929,0.084,0,0,0.309957866,0,1
105,3,14503,"HATCH, Orrin Grant",67,UTAH,200,0.67213528,0.382,0,0,0.620194878,0,0
105,3,14506,"LUGAR, Richard Green",22,INDIANA,200,0.204138864,0.304,0,1,0.531484064,0,1
105,3,14508,"MOYNIHAN, Daniel Patrick",13,NEW YOR,100,-0.818021097,-0.301,0,0,0.339825041,0,1
105,3,14617,"DASCHLE, Thomas Andrew",37,SOUTH D,100,-1.044925205,-0.303,0,0,0.519335854,0,1
105,3,14628,"GRAMM, William Philip (Phil)",49,TEXAS,200,1.702609744,0.551,0,0,0.526606234,0,0
105,3,14661,"SNOWE, Olympia Jean",2,MAINE,200,0.399678692,0.091,1,0,0.373378796,1,0
105,3,14709,"LEVIN, Carl",23,MICHIGA,100,-1.012357231,-0.395,1,0,0.426755866,0,0
105,3,14712,"WARNER, John William",40,VIRGINI,200,0.948588397,0.262,1,0,0.510605945,0,1
105,3,14806,"COATS, Daniel Ray",22,INDIANA,200,0.642058603,0.375,1,0,0.531484064,0,1
105,3,14809,"CRAIG, Larry Edwin",63,IDAHO,200,2.654040737,0.494,0,0,0.607990276,0,1
105,3,14812,"DORGAN, Byron Leslie",36,NORTH D,100,-0.704736737,-0.267,0,0,0.53911319,0,0
105,3,14826,"GREGG, Judd Alan",4,NEW HAM,200,0.935359089,0.429,0,0,0.443893338,0,0
105,3,14852,"ROBERTS, Charles Patrick (Pat)",32,KANSAS,200,0.71654552,0.415,1,0,0.600723655,0,1
105,3,14871,"WYDEN, Ronald Lee",72,OREGON,100,-0.843043483,-0.314,0,0,0.453068843,0,0
105,3,14900,"D'AMATO, Alfonse Marcello",13,NEW YOR,200,0.409845767,0.182,0,0,0.339825041,0,0
105,3,14904,"GORTON, Thomas Slade, III (Slade)",73,WASHING,200,0.497592924,0.271,0,0,0.428053472,0,1
105,3,14907,"MURKOWSKI, Frank Hughes",81,ALASKA,200,1.283311783,0.346,0,0,0.604285025,0,1
105,3,14908,"NICKLES, Donald Lee",53,OKLAHOM,200,1.852317212,0.52,0,0,0.544006091,0,0
105,3,14910,"SPECTER, Arlen",14,PENNSYL,200,0.072886809,0.068,0,0,0.448387946,0,1
105,3,14912,"BINGAMAN, Jesse Francis, Jr. (Jeff)",66,NEW MEX,100,-1.217333299,-0.266,1,0,0.459758694,0,1
105,3,14914,"LAUTENBERG, Frank Raleigh",12,NEW JER,100,-1.296284224,-0.382,0,0,0.400332147,0,1
105,3,14920,"KERRY, John Forbes",3,MASSACH,100,-1.273581864,-0.352,0,1,0.313601646,0,1
105,3,14921,"McCONNELL, Addison Mitchell (Mitch)",51,KENTUCK,200,1.211868454,0.404,0,0,0.494709488,0,1
105,3,14922,"ROCKEFELLER, John Davison IV (Jay)",56,WEST VI,100,-1.252897973,-0.326,0,0,0.416453348,0,0
105,3,15011,"BOXER, Barbara",71,CALIFOR,100,-1.380819788,-0.45,0,0,0.427837284,1,0
105,3,15020,"DeWINE, Michael",24,OHIO,200,0.610619021,0.289,0,0,0.464030508,0,0
105,3,15021,"DURBIN, Richard Joseph",21,ILLINOI,100,-1.188768123,-0.365,0,0,0.403949078,0,0
105,3,15037,"MACK, Connie, III",43,FLORIDA,200,1.323002149,0.466,0,0,0.468450388,0,0
105,3,15039,"McCAIN, John Sidney, III",61,ARIZONA,200,0.62813255,0.381,1,0,0.487762288,0,1
105,3,15054,"REID, Harry",65,NEVADA,100,-0.735586453,-0.276,0,0,0.494134686,0,0
105,3,15071,"TORRICELLI, Robert Guy",12,NEW JER,100,-0.824878092,-0.262,0,0,0.400332147,0,0
105,3,15116,"SMITH, Robert C.",4,NEW HAM,200,2.755181212,0.623,1,0,0.443893338,0,1
105,3,15424,"INHOFE, James Mountain",53,OKLAHOM,200,2.723889862,0.551,1,0,0.544006091,0,1
105,3,15425,"JOHNSON, Timothy Peter (Tim)",37,SOUTH D,100,-1.36738073,-0.25,0,0,0.519335854,0,0
105,3,15429,"KYL, Jon Llewellyn",61,ARIZONA,200,1.573602647,0.548,0,0,0.487762288,0,0
105,3,15501,"BOND, Christopher Samuel (Kit)",34,MISSOUR,200,1.235408767,0.31,0,0,0.464529625,0,0
105,3,15502,"CONRAD, Kent",36,NORTH D,100,-0.851680834,-0.296,0,0,0.53911319,0,0
105,3,15503,"GRAHAM, Daniel Robert (Bob)",43,FLORIDA,100,-0.491832386,-0.231,0,0,0.468450388,0,0
105,3,15633,"THOMAS, Craig Lyle",68,WYOMING,200,1.180199413,0.446,0,1,0.574879174,0,1
105,3,15700,"BRYAN, Richard H",65,NEVADA,100,-0.863211469,-0.241,0,0,0.494134686,0,1
105,3,15701,"BURNS, Conrad",64,MONTANA,200,1.496079048,0.361,0,0,0.516874105,0,1
105,3,15702,"KERREY, J. Robert",35,NEBRASK,100,-1.145099829,-0.223,0,0,0.605548225,0,1
105,3,15703,"KOHL, Herbert H.",25,WISCONS,100,-1.400694309,-0.256,0,0,0.440808033,0,1
105,3,15704,"LIEBERMAN, Joseph I.",1,CONNECT,100,-0.151925542,-0.205,1,0,0.396364931,0,0
105,3,15705,"ROBB, Charles Spittal",40,VIRGINI,100,-0.574303271,-0.2,1,1,0.510605945,0,1
105,3,29108,"ALLARD, A. Wayne",62,COLORAD,200,1.681583051,0.572,0,0,0.507592076,0,0
105,3,29141,"SANTORUM, Richard John (Rick)",14,PENNSYL,200,0.97804837,0.338,1,0,0.448387946,0,0
105,3,29142,"REED, John F. (Jack)",5,RHODE I,100,-1.067466771,-0.39,0,0,0.309957866,0,1
105,3,29306,"HUTCHINSON, Timothy",42,ARKANSA,200,2.000519636,0.419,0,0,0.406471751,0,0
105,3,29367,"GRAMS, Rod",33,MINNESO,200,1.486320349,0.506,0,1,0.406206112,0,0
105,3,29523,"BROWNBACK, Sam Dale",32,KANSAS,200,1.566929163,0.439,0,1,0.600723655,0,0
105,3,49101,"WELLSTONE, Paul David",33,MINNESO,100,-3.037390665,-0.583,0,1,0.406206112,0,0
105,3,49300,"FEINSTEIN, Dianne",71,CALIFOR,100,-0.79995824,-0.263,0,1,0.427837284,1,0
105,3,49301,"COVERDELL, Paul",44,GEORGIA,200,1.746821581,0.407,0,1,0.506322692,0,1
105,3,49302,"KEMPTHORNE, Dirk",63,IDAHO,200,2.459218173,0.46,1,0,0.607990276,0,0
105,3,49303,"MOSELEY BRAUN, Carol",21,ILLINOI,100,-1.148959246,-0.335,0,0,0.403949078,1,0
105,3,49304,"FAIRCLOTH, Duncan McLauchlin (Lauch)",47,NORTH C,200,4.070203261,0.709,0,0,0.525299867,0,0
105,3,49306,"HUTCHISON, Kathryn Ann Bailey (Kay)",49,TEXAS,200,1.640636683,0.356,0,0,0.526606234,1,0
105,3,49307,"BENNETT, Robert",67,UTAH,200,1.188517148,0.331,0,0,0.620194878,0,1
105,3,49308,"MURRAY, Patty",73,WASHING,100,-0.794045853,-0.342,0,0,0.428053472,1,0
105,3,49309,"FEINGOLD, Russell Dana",25,WISCONS,100,-1.610337397,-0.308,0,1,0.440808033,0,0
105,3,49500,"ABRAHAM, Spencer",23,MICHIGA,200,1.078265854,0.311,0,0,0.426755866,0,0
105,3,49501,"ASHCROFT, John David",34,MISSOUR,200,2.92561601,0.536,0,1,0.464529625,0,0
105,3,49502,"FRIST, William H.",54,TENNESS,200,0.596462292,0.366,0,1,0.487133577,0,0
105,3,49503,"THOMPSON, Fred Dalton",54,TENNESS,200,1.501987271,0.403,0,0,0.487133577,0,0
105,3,49700,"SESSIONS, Jefferson Beauregard III (Jeff)",41,ALABAMA,200,2.665135021,0.549,0,0,0.537338712,0,1
105,3,49701,"CLELAND, Joseph Maxwell (Max)",44,GEORGIA,100,-0.700762347,-0.22,1,0,0.506322692,0,1
105,3,49702,"LANDRIEU, Mary L.",45,LOUISIA,100,-0.820194496,-0.203,0,0,0.434391617,1,0
105,3,49703,"COLLINS, Susan Margaret",2,MAINE,200,0.324093099,0.107,0,0,0.373378796,1,0
105,3,49704,"HAGEL, Charles Timothy (Chuck)",35,NEBRASK,200,0.581868342,0.344,0,1,0.605548225,0,1
105,3,49705,"SMITH, Gordon Harold",72,OREGON,200,0.55667956,0.192,0,1,0.453068843,0,0
105,3,49706,"ENZI, Michael B.",68,WYOMING,200,1.269432208,0.537,0,0,0.574879174,0,1
105,3,94659,"SHELBY, Richard C.",41,ALABAMA,200,1.422285978,0.433,0,0,0.537338712,0,0
105,3,95407,"CAMPBELL, Ben Nighthorse",62,COLORAD,200,1.020710007,0.23,0,0,0.507592076,0,1
106,4,1366,"BYRD, Robert Carlyle",56,WEST VI,100,-0.307709246,-0.309,1,0,0.416453348,0,0
106,4,4812,"INOUYE, Daniel Ken",82,HAWAII,100,-0.876963467,-0.319,0,0,0.357238482,0,1
106,4,9369,"THURMOND, James Strom",48,SOUTH C,200,0.406640517,0.391,1,0,0.532207156,0,1
106,4,10808,"KENNEDY, Edward Moore (Ted)",3,MASSACH,100,-1.573787801,-0.443,1,0,0.313601646,0,1
106,4,11044,"ROTH, William Victor, Jr.",11,DELAWAR,200,1.55270177,0.272,0,0,0.413763434,0,1
106,4,11204,"HOLLINGS, Ernest Frederick",48,SOUTH C,100,-1.97118499,-0.293,0,0,0.532207156,0,1
106,4,12109,"STEVENS, Theodore Fulton (Ted)",81,ALASKA,200,1.170680446,0.219,0,0,0.604285025,0,1
106,4,13039,"SARBANES, Paul Spyros",52,MARYLAN,100,-1.707039459,-0.435,0,1,0.413615765,0,0
106,4,13056,"BREAUX, John Berlinger",45,LOUISIA,100,-0.207924396,-0.123,0,0,0.434391617,0,0
106,4,14009,"COCHRAN, William Thad",46,MISSISS,200,1.183373285,0.286,0,0,0.527472238,0,1
106,4,14031,"LOTT, Chester Trent",46,MISSISS,200,2.007572528,0.39,0,0,0.527472238,0,0
106,4,14101,"BIDEN, Joseph Robinette, Jr.",11,DELAWAR,100,-0.698304568,-0.314,0,1,0.413763434,0,0
106,4,14103,"DOMENICI, Pete Vichi",66,NEW MEX,200,1.32754185,0.257,0,0,0.459758694,0,0
106,4,14105,"HELMS, Jesse",47,NORTH C,200,0.380560874,0.631,0,1,0.525299867,0,1
106,4,14203,"BAUCUS, Max Sieben",64,MONTANA,100,-0.415407238,-0.212,0,0,0.516874105,0,0
106,4,14213,"DODD, Christopher John",1,CONNECT,100,-0.383326631,-0.328,0,1,0.396364931,0,1
106,4,14226,"GRASSLEY, Charles Ernest",31,IOWA,200,1.72021818,0.341,0,0,0.442666111,0,0
106,4,14230,"HARKIN, Thomas Richard (Tom)",31,IOWA,100,-1.721742745,-0.351,0,0,0.442666111,0,1
106,4,14240,"JEFFORDS, James Merrill",6,VERMONT,200,0.122903253,0.014,0,0,0.368171696,0,1
106,4,14307,"LEAHY, Patrick Joseph",6,VERMONT,100,-1.72625045,-0.375,0,0,0.368171696,0,0
106,4,14400,"AKAKA, Daniel Kahikina",82,HAWAII,100,-1.0564332,-0.419,0,0,0.357238482,0,1
106,4,14440,"MIKULSKI, Barbara Ann",52,MARYLAN,100,-1.635386074,-0.37,0,0,0.413615765,1,0
106,4,14500,"CHAFEE, John Hubbard",5,RHODE I,200,0.295394559,0.084,0,0,0.309957866,0,1
106,4,14503,"HATCH, Orrin Grant",67,UTAH,200,0.997623918,0.382,0,0,0.620194878,0,0
106,4,14506,"LUGAR, Richard Green",22,INDIANA,200,1.110603894,0.304,0,1,0.531484064,0,1
106,4,14508,"MOYNIHAN, Daniel Patrick",13,NEW YOR,100,-0.302318679,-0.301,0,0,0.339825041,0,1
106,4,14617,"DASCHLE, Thomas Andrew",37,SOUTH D,100,-0.560900872,-0.303,0,0,0.519335854,0,1
106,4,14628,"GRAMM, William Philip (Phil)",49,TEXAS,200,3.305662226,0.551,0,0,0.526606234,0,0
106,4,14661,"SNOWE, Olympia Jean",2,MAINE,200,0.187355165,0.091,1,0,0.373378796,1,0
106,4,14709,"LEVIN, Carl",23,MICHIGA,100,-1.198128697,-0.395,1,0,0.426755866,0,0
106,4,14712,"WARNER, John William",40,VIRGINI,200,1.53680007,0.262,1,0,0.510605945,0,1
106,4,14809,"CRAIG, Larry Edwin",63,IDAHO,200,1.946426961,0.494,0,0,0.607990276,0,1
106,4,14812,"DORGAN, Byron Leslie",36,NORTH D,100,-1.47215575,-0.267,0,0,0.53911319,0,0
106,4,14826,"GREGG, Judd Alan",4,NEW HAM,200,1.497389863,0.429,0,0,0.443893338,0,0
106,4,14852,"ROBERTS, Charles Patrick (Pat)",32,KANSAS,200,1.259210445,0.415,1,0,0.600723655,0,1
106,4,14858,"SCHUMER, Charles Ellis (Chuck)",13,NEW YOR,100,-0.917315111,-0.35,0,0,0.339825041,0,0
106,4,14871,"WYDEN, Ronald Lee",72,OREGON,100,-0.619151846,-0.314,0,0,0.453068843,0,0
106,4,14904,"GORTON, Thomas Slade, III (Slade)",73,WASHING,200,0.887039049,0.271,0,0,0.428053472,0,1
106,4,14907,"MURKOWSKI, Frank Hughes",81,ALASKA,200,2.029453566,0.346,0,0,0.604285025,0,1
106,4,14908,"NICKLES, Donald Lee",53,OKLAHOM,200,3.023431651,0.52,0,0,0.544006091,0,0
106,4,14910,"SPECTER, Arlen",14,PENNSYL,200,0.275023392,0.068,0,0,0.448387946,0,1
106,4,14912,"BINGAMAN, Jesse Francis, Jr. (Jeff)",66,NEW MEX,100,-0.525836928,-0.266,1,0,0.459758694,0,1
106,4,14914,"LAUTENBERG, Frank Raleigh",12,NEW JER,100,-1.077576498,-0.382,0,0,0.400332147,0,1
106,4,14920,"KERRY, John Forbes",3,MASSACH,100,-0.781101863,-0.352,0,1,0.313601646,0,1
106,4,14921,"McCONNELL, Addison Mitchell (Mitch)",51,KENTUCK,200,1.401797761,0.404,0,0,0.494709488,0,1
106,4,14922,"ROCKEFELLER, John Davison IV (Jay)",56,WEST VI,100,-1.075255146,-0.326,0,0,0.416453348,0,0
106,4,15011,"BOXER, Barbara",71,CALIFOR,100,-2.251095278,-0.45,0,1,0.427837284,1,0
106,4,15020,"DeWINE, Michael",24,OHIO,200,0.782782049,0.289,0,0,0.464030508,0,0
106,4,15021,"DURBIN, Richard Joseph",21,ILLINOI,100,-1.325286654,-0.365,0,0,0.403949078,0,0
106,4,15037,"MACK, Connie, III",43,FLORIDA,200,1.824133424,0.466,0,0,0.468450388,0,0
106,4,15039,"McCAIN, John Sidney, III",61,ARIZONA,200,1.797379858,0.381,1,0,0.487762288,0,1
106,4,15054,"REID, Harry",65,NEVADA,100,-0.717930235,-0.276,0,0,0.494134686,0,0
106,4,15071,"TORRICELLI, Robert Guy",12,NEW JER,100,-0.950942027,-0.262,0,1,0.400332147,0,0
106,4,15116,"SMITH, Robert C.",4,NEW HAM,200,0.341940817,0.623,1,0,0.443893338,0,1
106,4,15406,"BUNNING, James Paul David",51,KENTUCK,200,0.60998894,0.521,0,0,0.494709488,0,0
106,4,15424,"INHOFE, James Mountain",53,OKLAHOM,200,0.739843937,0.551,1,0,0.544006091,0,1
106,4,15425,"JOHNSON, Timothy Peter (Tim)",37,SOUTH D,100,-1.103713268,-0.25,0,0,0.519335854,0,0
106,4,15429,"KYL, Jon Llewellyn",61,ARIZONA,200,2.804590558,0.548,0,0,0.487762288,0,0
106,4,15501,"BOND, Christopher Samuel (Kit)",34,MISSOUR,200,1.484413636,0.31,0,0,0.464529625,0,0
106,4,15502,"CONRAD, Kent",36,NORTH D,100,-0.471126695,-0.296,0,0,0.53911319,0,0
106,4,15503,"GRAHAM, Daniel Robert (Bob)",43,FLORIDA,100,-0.218304216,-0.231,0,0,0.468450388,0,0
106,4,15633,"THOMAS, Craig Lyle",68,WYOMING,200,2.006272355,0.446,0,1,0.574879174,0,1
106,4,15700,"BRYAN, Richard H",65,NEVADA,100,-0.566462436,-0.241,0,0,0.494134686,0,1
106,4,15701,"BURNS, Conrad",64,MONTANA,200,1.399808595,0.361,0,0,0.516874105,0,1
106,4,15702,"KERREY, J. Robert",35,NEBRASK,100,-0.380824053,-0.223,0,0,0.605548225,0,1
106,4,15703,"KOHL, Herbert H.",25,WISCONS,100,-1.40627903,-0.256,0,0,0.440808033,0,1
106,4,15704,"LIEBERMAN, Joseph I.",1,CONNECT,100,-0.231958162,-0.205,1,0,0.396364931,0,0
106,4,15705,"ROBB, Charles Spittal",40,VIRGINI,100,-0.509266799,-0.2,1,0,0.510605945,0,1
106,4,29108,"ALLARD, A. Wayne",62,COLORAD,200,2.306539572,0.572,1,0,0.507592076,0,0
106,4,29141,"SANTORUM, Richard John (Rick)",14,PENNSYL,200,0.998372335,0.338,1,0,0.448387946,0,0
106,4,29142,"REED, John F. (Jack)",5,RHODE I,100,-1.900762013,-0.39,1,0,0.309957866,0,1
106,4,29305,"LINCOLN, Blanche Lambert",42,ARKANSA,100,-0.337703967,-0.166,0,0,0.406471751,1,0
106,4,29306,"HUTCHINSON, Timothy",42,ARKANSA,200,1.527600371,0.419,1,0,0.406471751,0,0
106,4,29345,"CRAPO, Michael Dean",63,IDAHO,200,2.509540793,0.507,0,0,0.607990276,0,0
106,4,29367,"GRAMS, Rod",33,MINNESO,200,1.598727317,0.506,0,1,0.406206112,0,0
106,4,29523,"BROWNBACK, Sam Dale",32,KANSAS,200,2.08737261,0.439,0,1,0.600723655,0,0
106,4,49101,"WELLSTONE, Paul David",33,MINNESO,100,-4.401515951,-0.583,0,1,0.406206112,0,0
106,4,49300,"FEINSTEIN, Dianne",71,CALIFOR,100,-0.496853048,-0.263,0,0,0.427837284,1,0
106,4,49301,"COVERDELL, Paul",44,GEORGIA,200,3.115069298,0.407,0,1,0.506322692,0,1
106,4,49306,"HUTCHISON, Kathryn Ann Bailey (Kay)",49,TEXAS,200,1.260745641,0.356,0,0,0.526606234,1,0
106,4,49307,"BENNETT, Robert",67,UTAH,200,1.358435162,0.331,0,0,0.620194878,0,1
106,4,49308,"MURRAY, Patty",73,WASHING,100,-0.517372559,-0.342,0,0,0.428053472,1,0
106,4,49309,"FEINGOLD, Russell Dana",25,WISCONS,100,-1.83904917,-0.308,0,1,0.440808033,0,0
106,4,49500,"ABRAHAM, Spencer",23,MICHIGA,200,0.990164674,0.311,0,0,0.426755866,0,0
106,4,49501,"ASHCROFT, John David",34,MISSOUR,200,1.88195019,0.536,0,1,0.464529625,0,0
106,4,49502,"FRIST, William H.",54,TENNESS,200,1.899692595,0.366,0,1,0.487133577,0,0
106,4,49503,"THOMPSON, Fred Dalton",54,TENNESS,200,1.678784695,0.403,0,0,0.487133577,0,0
106,4,49700,"SESSIONS, Jefferson Beauregard III (Jeff)",41,ALABAMA,200,0.962405075,0.549,1,0,0.537338712,0,1
106,4,49701,"CLELAND, Joseph Maxwell (Max)",44,GEORGIA,100,-0.843847743,-0.22,1,0,0.506322692,0,1
106,4,49702,"LANDRIEU, Mary L.",45,LOUISIA,100,-0.28815124,-0.203,1,0,0.434391617,1,0
106,4,49703,"COLLINS, Susan Margaret",2,MAINE,200,0.211498949,0.107,0,0,0.373378796,1,0
106,4,49704,"HAGEL, Charles Timothy (Chuck)",35,NEBRASK,200,1.162189242,0.344,0,1,0.605548225,0,1
106,4,49705,"SMITH, Gordon Harold",72,OREGON,200,0.437461688,0.192,0,1,0.453068843,0,0
106,4,49706,"ENZI, Michael B.",68,WYOMING,200,2.179679406,0.537,0,0,0.574879174,0,1
106,4,49900,"FITZGERALD, Peter G.",21,ILLINOI,200,1.11905727,0.28,0,0,0.403949078,0,0
106,4,49901,"BAYH, Evan",22,INDIANA,100,-0.424595161,-0.158,0,0,0.531484064,0,0
106,4,49902,"EDWARDS, John",47,NORTH C,100,-1.202280142,-0.291,0,0,0.525299867,0,0
106,4,49903,"VOINOVICH, George Victor",24,OHIO,200,1.038349112,0.239,0,0,0.464030508,0,0
106,4,49904,"MILLER, Zell Bryan",44,GEORGIA,100,-0.133862154,0.146,0,0,0.506322692,0,1
106,4,49905,"CHAFEE, Lincoln Davenport",5,RHODE I,200,0.22104235,0.003,0,1,0.309957866,0,0
106,4,94659,"SHELBY, Richard C.",41,ALABAMA,200,0.748173925,0.433,0,0,0.537338712,0,0
106,4,95407,"CAMPBELL, Ben Nighthorse",62,COLORAD,200,0.37204397,0.23,0,0,0.507592076,0,1
107,5,1366,"BYRD, Robert Carlyle",56,WEST VI,100,-1.714376023,-0.309,1,0,0.53242074,0,0
107,5,4812,"INOUYE, Daniel Ken",82,HAWAII,100,-1.562333566,-0.319,0,0,0.401727037,0,1
107,5,9369,"THURMOND, James Strom",48,SOUTH C,200,0.923297838,0.391,1,0,0.581476046,0,1
107,5,10808,"KENNEDY, Edward Moore (Ted)",3,MASSACH,100,-2.312816748,-0.443,1,0,0.352106562,0,1
107,5,11204,"HOLLINGS, Ernest Frederick",48,SOUTH C,100,-1.211546303,-0.293,0,0,0.581476046,0,1
107,5,12109,"STEVENS, Theodore Fulton (Ted)",81,ALASKA,200,1.177186325,0.219,0,0,0.679369486,0,1
107,5,13039,"SARBANES, Paul Spyros",52,MARYLAN,100,-2.335298392,-0.435,0,1,0.415291754,0,0
107,5,13056,"BREAUX, John Berlinger",45,LOUISIA,100,-0.152194052,-0.123,0,0,0.53939246,0,0
107,5,14009,"COCHRAN, William Thad",46,MISSISS,200,2.081160385,0.286,0,0,0.586008501,0,1
107,5,14031,"LOTT, Chester Trent",46,MISSISS,200,2.467223775,0.39,0,0,0.586008501,0,0
107,5,14101,"BIDEN, Joseph Robinette, Jr.",11,DELAWAR,100,-0.991138182,-0.314,0,1,0.432599352,0,0
107,5,14103,"DOMENICI, Pete Vichi",66,NEW MEX,200,1.340094082,0.257,0,0,0.49968074,0,0
107,5,14105,"HELMS, Jesse",47,NORTH C,200,1.981902236,0.631,0,1,0.56463997,0,1
107,5,14203,"BAUCUS, Max Sieben",64,MONTANA,100,-0.285259413,-0.212,0,0,0.63656362,0,0
107,5,14213,"DODD, Christopher John",1,CONNECT,100,-1.715504651,-0.328,0,1,0.40744342,0,1
107,5,14226,"GRASSLEY, Charles Ernest",31,IOWA,200,2.033082272,0.341,0,0,0.498372208,0,0
107,5,14230,"HARKIN, Thomas Richard (Tom)",31,IOWA,100,-1.484596107,-0.351,0,0,0.498372208,0,1
107,5,14240,"JEFFORDS, James Merrill",6,VERMONT,200,0.217301465,0.014,0,0,0.445596491,0,1
107,5,14307,"LEAHY, Patrick Joseph",6,VERMONT,100,-1.992430035,-0.375,0,0,0.445596491,0,0
107,5,14400,"AKAKA, Daniel Kahikina",82,HAWAII,100,-1.955760868,-0.419,1,0,0.401727037,0,1
107,5,14440,"MIKULSKI, Barbara Ann",52,MARYLAN,100,-1.749277771,-0.37,0,0,0.415291754,1,0
107,5,14503,"HATCH, Orrin Grant",67,UTAH,200,1.837142635,0.382,0,0,0.717255054,0,0
107,5,14506,"LUGAR, Richard Green",22,INDIANA,200,2.307454614,0.304,0,1,0.580047825,0,1
107,5,14617,"DASCHLE, Thomas Andrew",37,SOUTH D,100,-0.628099414,-0.303,0,0,0.616147126,0,1
107,5,14628,"GRAMM, William Philip (Phil)",49,TEXAS,200,2.653096361,0.551,0,0,0.609562701,0,0
107,5,14651,"NELSON, Clarence William (Bill)",43,FLORIDA,100,-0.783549714,-0.192,1,1,0.500046094,0,1
107,5,14661,"SNOWE, Olympia Jean",2,MAINE,200,0.568649996,0.091,0,0,0.472521585,1,0
107,5,14709,"LEVIN, Carl",23,MICHIGA,100,-2.270911503,-0.395,1,0,0.473653935,0,0
107,5,14712,"WARNER, John William",40,VIRGINI,200,1.20494833,0.262,1,0,0.541472363,0,1
107,5,14809,"CRAIG, Larry Edwin",63,IDAHO,200,1.852286621,0.494,0,0,0.708484905,0,1
107,5,14812,"DORGAN, Byron Leslie",36,NORTH D,100,-1.290258225,-0.267,0,0,0.647273966,0,0
107,5,14826,"GREGG, Judd Alan",4,NEW HAM,200,1.264684153,0.429,0,0,0.506678002,0,0
107,5,14852,"ROBERTS, Charles Patrick (Pat)",32,KANSAS,200,1.700297597,0.415,1,0,0.609169075,0,1
107,5,14858,"SCHUMER, Charles Ellis (Chuck)",13,NEW YOR,100,-1.34958353,-0.35,0,0,0.369109243,0,0
107,5,14871,"WYDEN, Ronald Lee",72,OREGON,100,-1.238491885,-0.314,0,0,0.49764108,0,0
107,5,14907,"MURKOWSKI, Frank Hughes",81,ALASKA,200,1.826611069,0.346,0,0,0.679369486,0,1
107,5,14908,"NICKLES, Donald Lee",53,OKLAHOM,200,2.385309328,0.52,0,0,0.610806712,0,0
107,5,14910,"SPECTER, Arlen",14,PENNSYL,200,0.535772874,0.068,0,0,0.478515213,0,1
107,5,14912,"BINGAMAN, Jesse Francis, Jr. (Jeff)",66,NEW MEX,100,-0.639702228,-0.266,1,0,0.49968074,0,1
107,5,14920,"KERRY, John Forbes",3,MASSACH,100,-0.955936461,-0.352,0,1,0.352106562,0,1
107,5,14921,"McCONNELL, Addison Mitchell (Mitch)",51,KENTUCK,200,1.905811693,0.404,0,0,0.57727787,0,1
107,5,14922,"ROCKEFELLER, John Davison IV (Jay)",56,WEST VI,100,-1.080981596,-0.326,0,1,0.53242074,0,0
107,5,15011,"BOXER, Barbara",71,CALIFOR,100,-2.192748319,-0.45,0,1,0.4379701,1,0
107,5,15015,"CARPER, Thomas Richard",11,DELAWAR,100,-0.707924759,-0.174,0,0,0.432599352,0,1
107,5,15020,"DeWINE, Michael",24,OHIO,200,1.656396854,0.289,0,0,0.518184317,0,0
107,5,15021,"DURBIN, Richard Joseph",21,ILLINOI,100,-1.815062788,-0.365,0,0,0.438199897,0,0
107,5,15039,"McCAIN, John Sidney, III",61,ARIZONA,200,1.246072236,0.381,1,0,0.532825992,0,1
107,5,15054,"REID, Harry",65,NEVADA,100,-1.389659561,-0.276,0,0,0.518568385,0,0
107,5,15071,"TORRICELLI, Robert Guy",12,NEW JER,100,-1.421028526,-0.262,0,1,0.417885906,0,0
107,5,15116,"SMITH, Robert C.",4,NEW HAM,200,1.17974955,0.623,1,0,0.506678002,0,1
107,5,15406,"BUNNING, James Paul David",51,KENTUCK,200,1.694194242,0.521,1,0,0.57727787,0,0
107,5,15424,"INHOFE, James Mountain",53,OKLAHOM,200,1.536777601,0.551,1,0,0.610806712,0,1
107,5,15425,"JOHNSON, Timothy Peter (Tim)",37,SOUTH D,100,-1.155238904,-0.25,0,0,0.616147126,0,0
107,5,15429,"KYL, Jon Llewellyn",61,ARIZONA,200,2.933898338,0.548,0,0,0.532825992,0,0
107,5,15501,"BOND, Christopher Samuel (Kit)",34,MISSOUR,200,2.113714597,0.31,0,0,0.517119487,0,0
107,5,15502,"CONRAD, Kent",36,NORTH D,100,-1.414169584,-0.296,0,0,0.647273966,0,0
107,5,15503,"GRAHAM, Daniel Robert (Bob)",43,FLORIDA,100,-0.743436253,-0.231,0,0,0.500046094,0,0
107,5,15633,"THOMAS, Craig Lyle",68,WYOMING,200,2.623351772,0.446,0,1,0.709823056,0,1
107,5,15701,"BURNS, Conrad",64,MONTANA,200,0.842995562,0.361,0,0,0.63656362,0,1
107,5,15703,"KOHL, Herbert H.",25,WISCONS,100,-0.856117209,-0.256,0,0,0.498849317,0,1
107,5,15704,"LIEBERMAN, Joseph I.",1,CONNECT,100,-0.579116078,-0.205,1,0,0.40744342,0,0
107,5,29108,"ALLARD, A. Wayne",62,COLORAD,200,2.122851445,0.572,1,0,0.544858358,0,0
107,5,29141,"SANTORUM, Richard John (Rick)",14,PENNSYL,200,1.510618317,0.338,1,0,0.478515213,0,0
107,5,29142,"REED, John F. (Jack)",5,RHODE I,100,-2.119374448,-0.39,1,0,0.343508839,0,1
107,5,29148,"ALLEN, George",40,VIRGINI,200,1.296200322,0.409,0,1,0.541472363,0,0
107,5,29305,"LINCOLN, Blanche Lambert",42,ARKANSA,100,-0.379858597,-0.166,0,0,0.528006895,1,0
107,5,29306,"HUTCHINSON, Timothy",42,ARKANSA,200,1.011472866,0.419,1,0,0.528006895,0,0
107,5,29345,"CRAPO, Michael Dean",63,IDAHO,200,1.796427767,0.507,0,0,0.708484905,0,0
107,5,29523,"BROWNBACK, Sam Dale",32,KANSAS,200,1.803800027,0.439,0,1,0.609169075,0,0
107,5,29537,"ENSIGN, John Eric",65,NEVADA,200,1.154692426,0.508,0,0,0.518568385,0,0
107,5,29732,"STABENOW, Deborah Ann",23,MICHIGA,100,-2.077536017,-0.327,0,0,0.473653935,0,0
107,5,39310,"CANTWELL, Maria E.",73,WASHING,100,-0.511597987,-0.287,0,0,0.47055229,1,0
107,5,40101,"DAYTON, Mark",33,MINNESO,100,-1.684237331,-0.421,1,0,0.48713588,0,0
107,5,40102,"CARNAHAN, Jean",34,MISSOUR,100,-0.896096789,-0.239,1,0,0.517119487,1,0
107,5,40103,"NELSON, Earl Benjamin (Ben)",35,NEBRASK,100,-0.19243346,-0.03,1,0,0.651794809,0,0
107,5,40104,"CORZINE, Jon Stevens",12,NEW JER,100,-2.336673678,-0.446,0,0,0.417885906,0,1
107,5,40105,"CLINTON, Hillary Rodham",13,NEW YOR,100,-1.191171238,-0.367,0,0,0.369109243,1,0
107,5,49101,"WELLSTONE, Paul David",33,MINNESO,100,-4.856200599,-0.583,0,1,0.48713588,0,0
107,5,49300,"FEINSTEIN, Dianne",71,CALIFOR,100,-0.761736647,-0.263,0,0,0.4379701,1,0
107,5,49306,"HUTCHISON, Kathryn Ann Bailey (Kay)",49,TEXAS,200,1.841911366,0.356,0,0,0.609562701,1,0
107,5,49307,"BENNETT, Robert",67,UTAH,200,1.954696202,0.331,0,0,0.717255054,0,1
107,5,49308,"MURRAY, Patty",73,WASHING,100,-1.092264327,-0.342,0,0,0.47055229,1,0
107,5,49309,"FEINGOLD, Russell Dana",25,WISCONS,100,-1.226551046,-0.308,0,1,0.498849317,0,0
107,5,49502,"FRIST, William H.",54,TENNESS,200,2.167637588,0.366,0,1,0.519628668,0,0
107,5,49503,"THOMPSON, Fred Dalton",54,TENNESS,200,2.405475122,0.403,0,0,0.519628668,0,0
107,5,49700,"SESSIONS, Jefferson Beauregard III (Jeff)",41,ALABAMA,200,0.900683147,0.549,1,0,0.575855284,0,1
107,5,49701,"CLELAND, Joseph Maxwell (Max)",44,GEORGIA,100,-0.586504564,-0.22,1,0,0.559837536,0,1
107,5,49702,"LANDRIEU, Mary L.",45,LOUISIA,100,-0.433337142,-0.203,1,0,0.53939246,1,0
107,5,49703,"COLLINS, Susan Margaret",2,MAINE,200,0.478799949,0.107,1,0,0.472521585,1,0
107,5,49704,"HAGEL, Charles Timothy (Chuck)",35,NEBRASK,200,1.746828877,0.344,0,1,0.651794809,0,1
107,5,49705,"SMITH, Gordon Harold",72,OREGON,200,0.699816154,0.192,0,1,0.49764108,0,0
107,5,49706,"ENZI, Michael B.",68,WYOMING,200,2.353837718,0.537,0,1,0.709823056,0,1
107,5,49900,"FITZGERALD, Peter G.",21,ILLINOI,200,1.763313165,0.28,0,0,0.438199897,0,0
107,5,49901,"BAYH, Evan",22,INDIANA,100,-0.583441423,-0.158,0,0,0.580047825,0,0
107,5,49902,"EDWARDS, John",47,NORTH C,100,-0.819472025,-0.291,0,0,0.56463997,0,0
107,5,49903,"VOINOVICH, George Victor",24,OHIO,200,1.244102454,0.239,0,0,0.518184317,0,0
107,5,49904,"MILLER, Zell Bryan",44,GEORGIA,100,0.201220893,0.146,0,0,0.559837536,0,1
107,5,49905,"CHAFEE, Lincoln Davenport",5,RHODE I,200,0.177932165,0.003,0,1,0.343508839,0,0
107,5,94240,"JEFFORDS, James Merrill",6,VERMONT,328,-1.346251164,-0.277,0,0,0.445596491,0,1
107,5,94240,"JEFFORDS, James Merrill",6,VERMONT,328,-1.346251164,-0.277,0,0,0.445596491,0,1
107,5,94659,"SHELBY, Richard C.",41,ALABAMA,200,0.575989215,0.433,0,0,0.575855284,0,0
107,5,95407,"CAMPBELL, Ben Nighthorse",62,COLORAD,200,0.643601795,0.23,0,0,0.544858358,0,1
108,6,1366,"BYRD, Robert Carlyle",56,WEST VI,100,-1.744223001,-0.309,1,0,0.53242074,0,0
108,6,4812,"INOUYE, Daniel Ken",82,HAWAII,100,-0.954601243,-0.319,0,0,0.401727037,0,1
108,6,10808,"KENNEDY, Edward Moore (Ted)",3,MASSACH,100,-2.395082779,-0.443,1,0,0.352106562,0,1
108,6,11204,"HOLLINGS, Ernest Frederick",48,SOUTH C,100,-1.243690427,-0.293,0,0,0.581476046,0,1
108,6,12109,"STEVENS, Theodore Fulton (Ted)",81,ALASKA,200,1.438455023,0.219,0,0,0.679369486,0,1
108,6,13039,"SARBANES, Paul Spyros",52,MARYLAN,100,-2.764248375,-0.435,0,1,0.415291754,0,0
108,6,13056,"BREAUX, John Berlinger",45,LOUISIA,100,-0.609080654,-0.123,0,0,0.53939246,0,0
108,6,14009,"COCHRAN, William Thad",46,MISSISS,200,1.715361491,0.286,0,0,0.586008501,0,1
108,6,14031,"LOTT, Chester Trent",46,MISSISS,200,1.698989675,0.39,0,0,0.586008501,0,0
108,6,14101,"BIDEN, Joseph Robinette, Jr.",11,DELAWAR,100,-0.825578527,-0.314,0,1,0.432599352,0,0
108,6,14103,"DOMENICI, Pete Vichi",66,NEW MEX,200,1.491534672,0.257,0,0,0.49968074,0,0
108,6,14203,"BAUCUS, Max Sieben",64,MONTANA,100,-0.803150046,-0.212,0,0,0.63656362,0,0
108,6,14213,"DODD, Christopher John",1,CONNECT,100,-1.430903199,-0.328,0,1,0.40744342,0,1
108,6,14226,"GRASSLEY, Charles Ernest",31,IOWA,200,1.897796784,0.341,0,0,0.498372208,0,0
108,6,14230,"HARKIN, Thomas Richard (Tom)",31,IOWA,100,-2.751203379,-0.351,0,0,0.498372208,0,1
108,6,14307,"LEAHY, Patrick Joseph",6,VERMONT,100,-1.937193483,-0.375,0,0,0.445596491,0,0
108,6,14400,"AKAKA, Daniel Kahikina",82,HAWAII,100,-1.791613242,-0.419,1,0,0.401727037,0,1
108,6,14440,"MIKULSKI, Barbara Ann",52,MARYLAN,100,-1.818473462,-0.37,0,0,0.415291754,1,0
108,6,14503,"HATCH, Orrin Grant",67,UTAH,200,1.729621807,0.382,0,0,0.717255054,0,0
108,6,14506,"LUGAR, Richard Green",22,INDIANA,200,1.420258988,0.304,0,1,0.580047825,0,1
108,6,14617,"DASCHLE, Thomas Andrew",37,SOUTH D,100,-1.65551622,-0.303,0,0,0.616147126,0,1
108,6,14651,"NELSON, Clarence William (Bill)",43,FLORIDA,100,-0.857571229,-0.192,1,1,0.500046094,0,1
108,6,14661,"SNOWE, Olympia Jean",2,MAINE,200,0.686299483,0.091,0,0,0.472521585,1,0
108,6,14709,"LEVIN, Carl",23,MICHIGA,100,-2.145206915,-0.395,1,0,0.473653935,0,0
108,6,14712,"WARNER, John William",40,VIRGINI,200,1.449227007,0.262,1,0,0.541472363,0,1
108,6,14809,"CRAIG, Larry Edwin",63,IDAHO,200,1.83658834,0.494,0,0,0.708484905,0,1
108,6,14812,"DORGAN, Byron Leslie",36,NORTH D,100,-1.326359112,-0.267,0,0,0.647273966,0,0
108,6,14826,"GREGG, Judd Alan",4,NEW HAM,200,1.328863295,0.429,0,0,0.506678002,0,0
108,6,14852,"ROBERTS, Charles Patrick (Pat)",32,KANSAS,200,1.717432083,0.415,1,0,0.609169075,0,1
108,6,14858,"SCHUMER, Charles Ellis (Chuck)",13,NEW YOR,100,-1.444226952,-0.35,0,0,0.369109243,0,0
108,6,14871,"WYDEN, Ronald Lee",72,OREGON,100,-1.470484447,-0.314,0,0,0.49764108,0,0
108,6,14908,"NICKLES, Donald Lee",53,OKLAHOM,200,2.221449593,0.52,0,0,0.610806712,0,0
108,6,14910,"SPECTER, Arlen",14,PENNSYL,200,0.639699955,0.068,0,0,0.478515213,0,1
108,6,14912,"BINGAMAN, Jesse Francis, Jr. (Jeff)",66,NEW MEX,100,-0.999612117,-0.266,0,0,0.49968074,0,1
108,6,14914,"LAUTENBERG, Frank Raleigh",12,NEW JER,100,-1.839193555,-0.382,0,0,0.417885906,0,1
108,6,14920,"KERRY, John Forbes",3,MASSACH,100,-1.801107564,-0.352,0,1,0.352106562,0,1
108,6,14921,"McCONNELL, Addison Mitchell (Mitch)",51,KENTUCK,200,1.930256254,0.404,0,0,0.57727787,0,1
108,6,14922,"ROCKEFELLER, John Davison IV (Jay)",56,WEST VI,100,-1.343187077,-0.326,0,1,0.53242074,0,0
108,6,15011,"BOXER, Barbara",71,CALIFOR,100,-1.857681168,-0.45,0,1,0.4379701,1,0
108,6,15015,"CARPER, Thomas Richard",11,DELAWAR,100,-0.864076999,-0.174,0,0,0.432599352,0,1
108,6,15020,"DeWINE, Michael",24,OHIO,200,0.993986208,0.289,0,0,0.518184317,0,0
108,6,15021,"DURBIN, Richard Joseph",21,ILLINOI,100,-2.005907994,-0.365,0,0,0.438199897,0,0
108,6,15039,"McCAIN, John Sidney, III",61,ARIZONA,200,0.772522637,0.381,1,0,0.532825992,0,1
108,6,15054,"REID, Harry",65,NEVADA,100,-2.100315432,-0.276,0,0,0.518568385,0,0
108,6,15406,"BUNNING, James Paul David",51,KENTUCK,200,2.477234531,0.521,0,0,0.57727787,0,0
108,6,15424,"INHOFE, James Mountain",53,OKLAHOM,200,2.428737844,0.551,1,0,0.610806712,0,1
108,6,15425,"JOHNSON, Timothy Peter (Tim)",37,SOUTH D,100,-1.695750987,-0.25,0,0,0.616147126,0,0
108,6,15429,"KYL, Jon Llewellyn",61,ARIZONA,200,2.741875927,0.548,0,0,0.532825992,0,0
108,6,15501,"BOND, Christopher Samuel (Kit)",34,MISSOUR,200,2.126990839,0.31,0,0,0.517119487,0,0
108,6,15502,"CONRAD, Kent",36,NORTH D,100,-0.896157145,-0.296,0,0,0.647273966,0,0
108,6,15503,"GRAHAM, Daniel Robert (Bob)",43,FLORIDA,100,-1.410504796,-0.231,0,0,0.500046094,0,0
108,6,15633,"THOMAS, Craig Lyle",68,WYOMING,200,3.168251273,0.446,0,0,0.709823056,0,1
108,6,15701,"BURNS, Conrad",64,MONTANA,200,1.702498099,0.361,0,0,0.63656362,0,1
108,6,15703,"KOHL, Herbert H.",25,WISCONS,100,-1.404293893,-0.256,0,0,0.498849317,0,1
108,6,15704,"LIEBERMAN, Joseph I.",1,CONNECT,100,-0.56645908,-0.205,1,0,0.40744342,0,0
108,6,29108,"ALLARD, A. Wayne",62,COLORAD,200,2.095750353,0.572,1,0,0.544858358,0,0
108,6,29141,"SANTORUM, Richard John (Rick)",14,PENNSYL,200,2.160869247,0.338,0,0,0.478515213,0,0
108,6,29142,"REED, John F. (Jack)",5,RHODE I,100,-2.221989383,-0.39,1,0,0.343508839,0,1
108,6,29148,"ALLEN, George",40,VIRGINI,200,1.315702452,0.409,0,1,0.541472363,0,0
108,6,29305,"LINCOLN, Blanche Lambert",42,ARKANSA,100,-1.086497462,-0.166,0,0,0.528006895,1,0
108,6,29345,"CRAPO, Michael Dean",63,IDAHO,200,1.848129988,0.507,0,0,0.708484905,0,0
108,6,29369,"TALENT, James Matthes",34,MISSOUR,200,1.458253583,0.364,1,0,0.517119487,0,0
108,6,29512,"CHAMBLISS, Saxby",44,GEORGIA,200,1.486240808,0.423,1,0,0.559837536,0,0
108,6,29523,"BROWNBACK, Sam Dale",32,KANSAS,200,1.484365606,0.439,0,1,0.609169075,0,0
108,6,29537,"ENSIGN, John Eric",65,NEVADA,200,1.493518757,0.508,1,0,0.518568385,0,0
108,6,29566,"GRAHAM, Lindsey O.",48,SOUTH C,200,1.196647937,0.409,1,0,0.581476046,0,1
108,6,29732,"STABENOW, Deborah Ann",23,MICHIGA,100,-1.507986013,-0.327,0,0,0.473653935,0,0
108,6,29740,"SUNUNU, John E.",4,NEW HAM,200,1.630465867,0.473,0,1,0.506678002,0,0
108,6,39310,"CANTWELL, Maria E.",73,WASHING,100,-1.112379787,-0.287,0,0,0.47055229,1,0
108,6,40101,"DAYTON, Mark",33,MINNESO,100,-1.277160236,-0.421,1,0,0.48713588,0,0
108,6,40103,"NELSON, Earl Benjamin (Ben)",35,NEBRASK,100,-0.33337242,-0.03,1,0,0.651794809,0,0
108,6,40104,"CORZINE, Jon Stevens",12,NEW JER,100,-1.789242625,-0.446,0,1,0.417885906,0,1
108,6,40105,"CLINTON, Hillary Rodham",13,NEW YOR,100,-1.574423316,-0.367,1,0,0.369109243,1,0
108,6,40300,"MURKOWSKI, Lisa",81,ALASKA,200,1.317986484,0.208,0,0,0.679369486,1,0
108,6,40301,"PRYOR, Mark",42,ARKANSA,100,-1.180150556,-0.199,1,0,0.528006895,0,0
108,6,40302,"COLEMAN, Norm",33,MINNESO,200,1.12950896,0.185,0,1,0.48713588,0,0
108,6,40303,"DOLE, Elizabeth Hanford",47,NORTH C,200,2.151050451,0.363,1,0,0.56463997,1,0
108,6,40304,"ALEXANDER, Lamar",54,TENNESS,200,1.627700768,0.323,0,1,0.519628668,0,0
108,6,40305,"CORNYN, John",49,TEXAS,200,2.0307659,0.497,1,0,0.609562701,0,0
108,6,49300,"FEINSTEIN, Dianne",71,CALIFOR,100,-1.202226212,-0.263,0,0,0.4379701,1,0
108,6,49306,"HUTCHISON, Kathryn Ann Bailey (Kay)",49,TEXAS,200,1.076267603,0.356,0,0,0.609562701,1,0
108,6,49307,"BENNETT, Robert",67,UTAH,200,1.719091799,0.331,0,0,0.717255054,0,1
108,6,49308,"MURRAY, Patty",73,WASHING,100,-1.408840998,-0.342,0,0,0.47055229,1,0
108,6,49309,"FEINGOLD, Russell Dana",25,WISCONS,100,-1.615303944,-0.308,0,1,0.498849317,0,0
108,6,49502,"FRIST, William H.",54,TENNESS,200,1.2798744,0.366,0,0,0.519628668,0,0
108,6,49700,"SESSIONS, Jefferson Beauregard III (Jeff)",41,ALABAMA,200,2.802064771,0.549,1,0,0.575855284,0,1
108,6,49702,"LANDRIEU, Mary L.",45,LOUISIA,100,-0.818340364,-0.203,0,0,0.53939246,1,0
108,6,49703,"COLLINS, Susan Margaret",2,MAINE,200,0.757923307,0.107,1,0,0.472521585,1,0
108,6,49704,"HAGEL, Charles Timothy (Chuck)",35,NEBRASK,200,1.131434227,0.344,0,1,0.651794809,0,1
108,6,49705,"SMITH, Gordon Harold",72,OREGON,200,1.359498115,0.192,0,0,0.49764108,0,0
108,6,49706,"ENZI, Michael B.",68,WYOMING,200,2.541911823,0.537,0,1,0.709823056,0,1
108,6,49900,"FITZGERALD, Peter G.",21,ILLINOI,200,1.304228333,0.28,0,0,0.438199897,0,0
108,6,49901,"BAYH, Evan",22,INDIANA,100,-0.562766303,-0.158,1,0,0.580047825,0,0
108,6,49902,"EDWARDS, John",47,NORTH C,100,-1.545981882,-0.291,0,0,0.56463997,0,0
108,6,49903,"VOINOVICH, George Victor",24,OHIO,200,1.005224105,0.239,0,1,0.518184317,0,0
108,6,49904,"MILLER, Zell Bryan",44,GEORGIA,100,1.503565527,0.146,0,0,0.559837536,0,1
108,6,49905,"CHAFEE, Lincoln Davenport",5,RHODE I,200,0.477060312,0.003,0,1,0.343508839,0,0
108,6,94240,"JEFFORDS, James Merrill",6,VERMONT,328,-1.205499616,-0.277,0,0,0.445596491,0,1
108,6,94659,"SHELBY, Richard C.",41,ALABAMA,200,1.54464917,0.433,0,0,0.575855284,0,0
108,6,95407,"CAMPBELL, Ben Nighthorse",62,COLORAD,200,0.944656655,0.23,0,0,0.544858358,0,1
109,7,1366,"BYRD, Robert Carlyle",56,WEST VI,100,-0.953891749,-0.309,1,0,0.564797106,0,0
109,7,4812,"INOUYE, Daniel Ken",82,HAWAII,100,-1.106977601,-0.319,0,0,0.45595552,0,1
109,7,10808,"KENNEDY, Edward Moore (Ted)",3,MASSACH,100,-1.970311889,-0.443,1,0,0.372571445,0,1
109,7,12109,"STEVENS, Theodore Fulton (Ted)",81,ALASKA,200,1.362930909,0.219,0,0,0.63226283,0,1
109,7,13039,"SARBANES, Paul Spyros",52,MARYLAN,100,-1.732038823,-0.435,0,1,0.434344158,0,0
109,7,14009,"COCHRAN, William Thad",46,MISSISS,200,1.612766122,0.286,0,0,0.599244144,0,1
109,7,14031,"LOTT, Chester Trent",46,MISSISS,200,1.895049904,0.39,0,0,0.599244144,0,0
109,7,14101,"BIDEN, Joseph Robinette, Jr.",11,DELAWAR,100,-1.098645253,-0.314,0,1,0.461684938,0,0
109,7,14103,"DOMENICI, Pete Vichi",66,NEW MEX,200,1.531087586,0.257,0,0,0.504003359,0,0
109,7,14203,"BAUCUS, Max Sieben",64,MONTANA,100,-0.727436553,-0.212,0,0,0.605000762,0,0
109,7,14213,"DODD, Christopher John",1,CONNECT,100,-1.914504462,-0.328,0,1,0.447250524,0,1
109,7,14226,"GRASSLEY, Charles Ernest",31,IOWA,200,2.330387668,0.341,0,0,0.503366793,0,0
109,7,14230,"HARKIN, Thomas Richard (Tom)",31,IOWA,100,-2.666687352,-0.351,0,0,0.503366793,0,1
109,7,14307,"LEAHY, Patrick Joseph",6,VERMONT,100,-2.421485767,-0.375,0,0,0.396989979,0,0
109,7,14400,"AKAKA, Daniel Kahikina",82,HAWAII,100,-1.790985072,-0.419,1,0,0.45595552,0,1
109,7,14440,"MIKULSKI, Barbara Ann",52,MARYLAN,100,-1.659985306,-0.37,0,0,0.434344158,1,0
109,7,14503,"HATCH, Orrin Grant",67,UTAH,200,1.863117512,0.382,0,0,0.733464392,0,0
109,7,14506,"LUGAR, Richard Green",22,INDIANA,200,0.691318659,0.304,0,1,0.604234762,0,1
109,7,14651,"NELSON, Clarence William (Bill)",43,FLORIDA,100,-0.48646422,-0.192,1,1,0.525236796,0,1
109,7,14661,"SNOWE, Olympia Jean",2,MAINE,200,0.270094744,0.091,0,0,0.454169836,1,0
109,7,14709,"LEVIN, Carl",23,MICHIGA,100,-2.313018452,-0.395,1,0,0.482741555,0,0
109,7,14712,"WARNER, John William",40,VIRGINI,200,0.984580633,0.262,1,0,0.541336967,0,1
109,7,14809,"CRAIG, Larry Edwin",63,IDAHO,200,1.154789803,0.494,0,0,0.693227382,0,1
109,7,14812,"DORGAN, Byron Leslie",36,NORTH D,100,-0.702948674,-0.267,0,0,0.639093541,0,0
109,7,14826,"GREGG, Judd Alan",4,NEW HAM,200,1.565122602,0.429,0,0,0.493097114,0,0
109,7,14852,"ROBERTS, Charles Patrick (Pat)",32,KANSAS,200,1.772622539,0.415,1,0,0.628670988,0,1
109,7,14858,"SCHUMER, Charles Ellis (Chuck)",13,NEW YOR,100,-1.105400336,-0.35,0,0,0.407122343,0,0
109,7,14871,"WYDEN, Ronald Lee",72,OREGON,100,-1.8154536,-0.314,0,0,0.478913742,0,0
109,7,14910,"SPECTER, Arlen",14,PENNSYL,200,0.227603167,0.068,0,0,0.487417179,0,1
109,7,14912,"BINGAMAN, Jesse Francis, Jr. (Jeff)",66,NEW MEX,100,-1.706656808,-0.266,0,0,0.504003359,0,1
109,7,14914,"LAUTENBERG, Frank Raleigh",12,NEW JER,100,-1.442856431,-0.382,0,0,0.466294637,0,1
109,7,14920,"KERRY, John Forbes",3,MASSACH,100,-1.509573306,-0.352,0,1,0.372571445,0,1
109,7,14921,"McCONNELL, Addison Mitchell (Mitch)",51,KENTUCK,200,2.210924014,0.404,0,0,0.600076199,0,1
109,7,14922,"ROCKEFELLER, John Davison IV (Jay)",56,WEST VI,100,-1.077220899,-0.326,0,0,0.564797106,0,0
109,7,15011,"BOXER, Barbara",71,CALIFOR,100,-2.423070973,-0.45,0,1,0.449586795,1,0
109,7,15015,"CARPER, Thomas Richard",11,DELAWAR,100,-0.910630645,-0.174,0,0,0.461684938,0,1
109,7,15020,"DeWINE, Michael",24,OHIO,200,0.550391374,0.289,0,0,0.510587607,0,0
109,7,15021,"DURBIN, Richard Joseph",21,ILLINOI,100,-2.46917751,-0.365,0,0,0.44791366,0,0
109,7,15039,"McCAIN, John Sidney, III",61,ARIZONA,200,0.986769382,0.381,1,0,0.55275005,0,1
109,7,15054,"REID, Harry",65,NEVADA,100,-1.561976817,-0.276,0,0,0.513175957,0,0
109,7,15406,"BUNNING, James Paul David",51,KENTUCK,200,3.101408385,0.521,0,0,0.600076199,0,0
109,7,15424,"INHOFE, James Mountain",53,OKLAHOM,200,2.613698947,0.551,1,0,0.655704017,0,1
109,7,15425,"JOHNSON, Timothy Peter (Tim)",37,SOUTH D,100,-1.031584662,-0.25,0,0,0.609132908,0,0
109,7,15429,"KYL, Jon Llewellyn",61,ARIZONA,200,2.311988313,0.548,0,0,0.55275005,0,0
109,7,15501,"BOND, Christopher Samuel (Kit)",34,MISSOUR,200,1.853375778,0.31,0,0,0.536197127,0,0
109,7,15502,"CONRAD, Kent",36,NORTH D,100,-0.531771964,-0.296,0,0,0.639093541,0,0
109,7,15633,"THOMAS, Craig Lyle",68,WYOMING,200,2.303719394,0.446,0,0,0.703127032,0,1
109,7,15701,"BURNS, Conrad",64,MONTANA,200,2.047771085,0.361,0,0,0.605000762,0,1
109,7,15703,"KOHL, Herbert H.",25,WISCONS,100,-1.076192521,-0.256,0,0,0.498081967,0,1
109,7,15704,"LIEBERMAN, Joseph I.",1,CONNECT,100,-0.772220911,-0.205,1,0,0.447250524,0,0
109,7,29108,"ALLARD, A. Wayne",62,COLORAD,200,2.83678435,0.572,0,0,0.523664265,0,0
109,7,29141,"SANTORUM, Richard John (Rick)",14,PENNSYL,200,2.320966391,0.338,0,0,0.487417179,0,0
109,7,29142,"REED, John F. (Jack)",5,RHODE I,100,-1.603192226,-0.39,1,0,0.394224894,0,1
109,7,29148,"ALLEN, George",40,VIRGINI,200,1.254452337,0.409,0,1,0.541336967,0,0
109,7,29305,"LINCOLN, Blanche Lambert",42,ARKANSA,100,-0.921377224,-0.166,0,0,0.549357483,1,0
109,7,29345,"CRAPO, Michael Dean",63,IDAHO,200,1.822828339,0.507,0,0,0.693227382,0,0
109,7,29369,"TALENT, James Matthes",34,MISSOUR,200,1.000834691,0.364,1,0,0.536197127,0,0
109,7,29373,"MENENDEZ, Robert",12,NEW JER,100,-1.529196101,-0.36,0,0,0.466294637,0,0
109,7,29512,"CHAMBLISS, Saxby",44,GEORGIA,200,2.250162757,0.423,1,0,0.583542327,0,0
109,7,29523,"BROWNBACK, Sam Dale",32,KANSAS,200,1.194589782,0.439,0,0,0.628670988,0,0
109,7,29537,"ENSIGN, John Eric",65,NEVADA,200,1.97230729,0.508,1,0,0.513175957,0,0
109,7,29548,"BURR, Richard M.",47,NORTH C,200,2.311813682,0.454,0,0,0.56241972,0,0
109,7,29555,"COBURN, Thomas Allen",53,OKLAHOM,200,1.947778395,0.782,0,0,0.655704017,0,0
109,7,29566,"GRAHAM, Lindsey O.",48,SOUTH C,200,1.182801528,0.409,1,0,0.586353586,0,1
109,7,29732,"STABENOW, Deborah Ann",23,MICHIGA,100,-1.329870278,-0.327,0,0,0.482741555,0,0
109,7,29740,"SUNUNU, John E.",4,NEW HAM,200,1.216157065,0.473,0,1,0.493097114,0,0
109,7,29754,"THUNE, John",37,SOUTH D,200,1.273582788,0.409,1,0,0.609132908,0,0
109,7,29909,"ISAKSON, Johnny",44,GEORGIA,200,2.049459477,0.404,0,0,0.583542327,0,1
109,7,29918,"VITTER, David",45,LOUISIA,200,1.825439362,0.495,0,0,0.573309413,0,0
109,7,29936,"DeMINT, James W.",48,SOUTH C,200,3.914976404,0.7,0,0,0.586353586,0,0
109,7,39310,"CANTWELL, Maria E.",73,WASHING,100,-1.56520567,-0.287,0,0,0.463534623,1,0
109,7,40101,"DAYTON, Mark",33,MINNESO,100,-1.749786945,-0.421,1,0,0.482390894,0,0
109,7,40103,"NELSON, Earl Benjamin (Ben)",35,NEBRASK,100,-0.05359445,-0.03,1,0,0.668473373,0,0
109,7,40104,"CORZINE, Jon Stevens",12,NEW JER,100,-1.732700987,-0.446,0,0,0.466294637,0,1
109,7,40105,"CLINTON, Hillary Rodham",13,NEW YOR,100,-1.235146377,-0.367,1,0,0.407122343,1,0
109,7,40300,"MURKOWSKI, Lisa",81,ALASKA,200,1.181568538,0.208,0,1,0.63226283,1,0
109,7,40301,"PRYOR, Mark",42,ARKANSA,100,-0.531971886,-0.199,0,0,0.549357483,0,0
109,7,40302,"COLEMAN, Norm",33,MINNESO,200,0.734099135,0.185,0,1,0.482390894,0,0
109,7,40303,"DOLE, Elizabeth Hanford",47,NORTH C,200,1.907701809,0.363,1,0,0.56241972,1,0
109,7,40304,"ALEXANDER, Lamar",54,TENNESS,200,1.591593045,0.323,0,1,0.571981926,0,0
109,7,40305,"CORNYN, John",49,TEXAS,200,2.581845195,0.497,1,0,0.615101919,0,0
109,7,40500,"SALAZAR, Kenneth Lee",62,COLORAD,100,-1.13890073,-0.223,0,0,0.523664265,0,0
109,7,40501,"MARTINEZ, Melquiades R. (Mel)",43,FLORIDA,200,0.94587695,0.333,0,1,0.525236796,0,0
109,7,40502,"OBAMA, Barack",21,ILLINOI,100,-1.626029591,-0.343,0,1,0.44791366,0,0
109,7,49300,"FEINSTEIN, Dianne",71,CALIFOR,100,-1.184352544,-0.263,0,0,0.449586795,1,0
109,7,49306,"HUTCHISON, Kathryn Ann Bailey (Kay)",49,TEXAS,200,1.312957753,0.356,0,0,0.615101919,1,0
109,7,49307,"BENNETT, Robert",67,UTAH,200,1.461031344,0.331,0,0,0.733464392,0,1
109,7,49308,"MURRAY, Patty",73,WASHING,100,-1.732978197,-0.342,0,0,0.463534623,1,0
109,7,49309,"FEINGOLD, Russell Dana",25,WISCONS,100,-2.517679219,-0.308,0,1,0.498081967,0,0
109,7,49502,"FRIST, William H.",54,TENNESS,200,1.713237319,0.366,0,0,0.571981926,0,0
109,7,49700,"SESSIONS, Jefferson Beauregard III (Jeff)",41,ALABAMA,200,3.584530681,0.549,1,0,0.628977714,0,1
109,7,49702,"LANDRIEU, Mary L.",45,LOUISIA,100,-0.657067395,-0.203,0,0,0.573309413,1,0
109,7,49703,"COLLINS, Susan Margaret",2,MAINE,200,0.413004654,0.107,1,0,0.454169836,1,0
109,7,49704,"HAGEL, Charles Timothy (Chuck)",35,NEBRASK,200,0.931013993,0.344,0,1,0.668473373,0,1
109,7,49705,"SMITH, Gordon Harold",72,OREGON,200,1.010988468,0.192,0,0,0.478913742,0,0
109,7,49706,"ENZI, Michael B.",68,WYOMING,200,1.887722902,0.537,0,0,0.703127032,0,1
109,7,49901,"BAYH, Evan",22,INDIANA,100,-0.927866374,-0.158,1,0,0.604234762,0,0
109,7,49903,"VOINOVICH, George Victor",24,OHIO,200,0.842307722,0.239,0,1,0.510587607,0,0
109,7,49905,"CHAFEE, Lincoln Davenport",5,RHODE I,200,-0.078221676,0.003,0,1,0.394224894,0,0
109,7,94240,"JEFFORDS, James Merrill",6,VERMONT,328,-2.282697563,-0.277,0,0,0.396989979,0,1
109,7,94659,"SHELBY, Richard C.",41,ALABAMA,200,1.820181966,0.433,0,0,0.628977714,0,0
110,8,1366,"BYRD, Robert Carlyle",56,WEST VI,100,-1.469414583,-0.309,1,0,0.564797106,0,0
110,8,4812,"INOUYE, Daniel Ken",82,HAWAII,100,-0.894380148,-0.319,0,0,0.45595552,0,1
110,8,10808,"KENNEDY, Edward Moore (Ted)",3,MASSACH,100,-1.687529926,-0.443,1,0,0.372571445,0,1
110,8,12109,"STEVENS, Theodore Fulton (Ted)",81,ALASKA,200,0.760183083,0.219,0,0,0.63226283,0,1
110,8,14009,"COCHRAN, William Thad",46,MISSISS,200,1.155061363,0.286,0,0,0.599244144,0,1
110,8,14031,"LOTT, Chester Trent",46,MISSISS,200,1.513288643,0.39,0,0,0.599244144,0,0
110,8,14101,"BIDEN, Joseph Robinette, Jr.",11,DELAWAR,100,-1.559704994,-0.314,0,1,0.461684938,0,0
110,8,14103,"DOMENICI, Pete Vichi",66,NEW MEX,200,1.108384802,0.257,0,0,0.504003359,0,0
110,8,14203,"BAUCUS, Max Sieben",64,MONTANA,100,-0.947624369,-0.212,0,0,0.605000762,0,0
110,8,14213,"DODD, Christopher John",1,CONNECT,100,-1.739956622,-0.328,0,1,0.447250524,0,1
110,8,14226,"GRASSLEY, Charles Ernest",31,IOWA,200,2.142476255,0.341,0,0,0.503366793,0,0
110,8,14230,"HARKIN, Thomas Richard (Tom)",31,IOWA,100,-2.851739838,-0.351,0,0,0.503366793,0,1
110,8,14307,"LEAHY, Patrick Joseph",6,VERMONT,100,-2.169162764,-0.375,0,0,0.396989979,0,0
110,8,14400,"AKAKA, Daniel Kahikina",82,HAWAII,100,-1.780715383,-0.419,1,0,0.45595552,0,1
110,8,14440,"MIKULSKI, Barbara Ann",52,MARYLAN,100,-0.90050927,-0.37,0,0,0.434344158,1,0
110,8,14503,"HATCH, Orrin Grant",67,UTAH,200,1.61985158,0.382,0,0,0.733464392,0,0
110,8,14506,"LUGAR, Richard Green",22,INDIANA,200,0.691814404,0.304,0,1,0.604234762,0,1
110,8,14651,"NELSON, Clarence William (Bill)",43,FLORIDA,100,-0.801225236,-0.192,1,1,0.525236796,0,1
110,8,14661,"SNOWE, Olympia Jean",2,MAINE,200,0.172806437,0.091,0,0,0.454169836,1,0
110,8,14709,"LEVIN, Carl",23,MICHIGA,100,-1.387384627,-0.395,1,0,0.482741555,0,0
110,8,14712,"WARNER, John William",40,VIRGINI,200,0.650961601,0.262,1,0,0.541336967,0,1
110,8,14809,"CRAIG, Larry Edwin",63,IDAHO,200,1.698509149,0.494,0,0,0.693227382,0,1
110,8,14812,"DORGAN, Byron Leslie",36,NORTH D,100,-1.078232516,-0.267,0,0,0.639093541,0,0
110,8,14826,"GREGG, Judd Alan",4,NEW HAM,200,1.747814127,0.429,0,0,0.493097114,0,0
110,8,14852,"ROBERTS, Charles Patrick (Pat)",32,KANSAS,200,1.374102075,0.415,0,0,0.628670988,0,1
110,8,14858,"SCHUMER, Charles Ellis (Chuck)",13,NEW YOR,100,-1.918684129,-0.35,0,0,0.407122343,0,0
110,8,14871,"WYDEN, Ronald Lee",72,OREGON,100,-2.066515334,-0.314,0,0,0.478913742,0,0
110,8,14910,"SPECTER, Arlen",14,PENNSYL,200,0.337730836,0.068,0,0,0.487417179,0,1
110,8,14912,"BINGAMAN, Jesse Francis, Jr. (Jeff)",66,NEW MEX,100,-1.440352789,-0.266,0,0,0.504003359,0,1
110,8,14914,"LAUTENBERG, Frank Raleigh",12,NEW JER,100,-2.107645386,-0.382,0,0,0.466294637,0,1
110,8,14920,"KERRY, John Forbes",3,MASSACH,100,-2.228328188,-0.352,0,1,0.372571445,0,1
110,8,14921,"McCONNELL, Addison Mitchell (Mitch)",51,KENTUCK,200,1.736620062,0.404,0,0,0.600076199,0,1
110,8,14922,"ROCKEFELLER, John Davison IV (Jay)",56,WEST VI,100,-0.903680114,-0.326,0,0,0.564797106,0,0
110,8,15011,"BOXER, Barbara",71,CALIFOR,100,-2.119213059,-0.45,0,1,0.449586795,1,0
110,8,15015,"CARPER, Thomas Richard",11,DELAWAR,100,-0.687791623,-0.174,0,0,0.461684938,0,1
110,8,15021,"DURBIN, Richard Joseph",21,ILLINOI,100,-2.060225899,-0.365,0,0,0.44791366,0,0
110,8,15039,"McCAIN, John Sidney, III",61,ARIZONA,200,1.273593588,0.381,1,0,0.55275005,0,1
110,8,15054,"REID, Harry",65,NEVADA,100,-1.396876301,-0.276,0,0,0.513175957,0,0
110,8,15406,"BUNNING, James Paul David",51,KENTUCK,200,2.373896236,0.521,0,0,0.600076199,0,0
110,8,15408,"CARDIN, Benjamin Louis",52,MARYLAN,100,-1.722496437,-0.329,0,1,0.434344158,0,0
110,8,15424,"INHOFE, James Mountain",53,OKLAHOM,200,2.928045737,0.551,1,0,0.655704017,0,1
110,8,15425,"JOHNSON, Timothy Peter (Tim)",37,SOUTH D,100,-0.572671042,-0.25,0,0,0.609132908,0,0
110,8,15429,"KYL, Jon Llewellyn",61,ARIZONA,200,2.360227547,0.548,0,0,0.55275005,0,0
110,8,15501,"BOND, Christopher Samuel (Kit)",34,MISSOUR,200,1.449539144,0.31,0,0,0.536197127,0,0
110,8,15502,"CONRAD, Kent",36,NORTH D,100,-0.877081734,-0.296,0,0,0.639093541,0,0
110,8,15633,"THOMAS, Craig Lyle",68,WYOMING,200,3.45171481,0.446,0,0,0.703127032,0,1
110,8,15703,"KOHL, Herbert H.",25,WISCONS,100,-1.195546667,-0.256,0,0,0.498081967,0,1
110,8,15704,"LIEBERMAN, Joseph I.",1,CONNECT,100,0.102904912,-0.205,1,0,0.447250524,0,0
110,8,29108,"ALLARD, A. Wayne",62,COLORAD,200,2.750971525,0.572,0,0,0.523664265,0,0
110,8,29142,"REED, John F. (Jack)",5,RHODE I,100,-1.474563053,-0.39,1,0,0.394224894,0,1
110,8,29147,"SANDERS, Bernard",6,VERMONT,328,-2.169964635,-0.511,0,0,0.396989979,0,0
110,8,29305,"LINCOLN, Blanche Lambert",42,ARKANSA,100,-0.773256655,-0.166,0,0,0.549357483,1,0
110,8,29345,"CRAPO, Michael Dean",63,IDAHO,200,2.142624558,0.507,0,0,0.693227382,0,0
110,8,29373,"MENENDEZ, Robert",12,NEW JER,100,-2.119633388,-0.36,0,1,0.466294637,0,0
110,8,29389,"BROWN, Sherrod",24,OHIO,100,-2.264285845,-0.439,0,0,0.510587607,0,0
110,8,29512,"CHAMBLISS, Saxby",44,GEORGIA,200,2.404537246,0.423,1,0,0.583542327,0,0
110,8,29523,"BROWNBACK, Sam Dale",32,KANSAS,200,1.267619549,0.439,0,0,0.628670988,0,0
110,8,29534,"WICKER, Roger F.",46,MISSISS,200,1.896684444,0.376,1,0,0.599244144,0,1
110,8,29537,"ENSIGN, John Eric",65,NEVADA,200,2.623344056,0.508,1,0,0.513175957,0,0
110,8,29548,"BURR, Richard M.",47,NORTH C,200,2.174978899,0.454,0,0,0.56241972,0,0
110,8,29555,"COBURN, Thomas Allen",53,OKLAHOM,200,3.110168157,0.782,0,0,0.655704017,0,0
110,8,29566,"GRAHAM, Lindsey O.",48,SOUTH C,200,1.981782948,0.409,1,0,0.586353586,0,1
110,8,29732,"STABENOW, Deborah Ann",23,MICHIGA,100,-1.512765225,-0.327,0,0,0.482741555,0,0
110,8,29740,"SUNUNU, John E.",4,NEW HAM,200,0.911429306,0.473,0,1,0.493097114,0,0
110,8,29754,"THUNE, John",37,SOUTH D,200,1.9163273,0.409,1,0,0.609132908,0,0
110,8,29909,"ISAKSON, Johnny",44,GEORGIA,200,2.079872114,0.404,0,1,0.583542327,0,1
110,8,29918,"VITTER, David",45,LOUISIA,200,2.288754947,0.495,0,1,0.573309413,0,0
110,8,29936,"DeMINT, James W.",48,SOUTH C,200,4.618881705,0.7,0,1,0.586353586,0,0
110,8,39310,"CANTWELL, Maria E.",73,WASHING,100,-2.168235953,-0.287,0,0,0.463534623,1,0
110,8,40103,"NELSON, Earl Benjamin (Ben)",35,NEBRASK,100,-0.287958078,-0.03,1,0,0.668473373,0,0
110,8,40105,"CLINTON, Hillary Rodham",13,NEW YOR,100,-2.007120202,-0.367,1,0,0.407122343,1,0
110,8,40300,"MURKOWSKI, Lisa",81,ALASKA,200,0.757242327,0.208,0,1,0.63226283,1,0
110,8,40301,"PRYOR, Mark",42,ARKANSA,100,-0.295432706,-0.199,1,0,0.549357483,0,0
110,8,40302,"COLEMAN, Norm",33,MINNESO,200,0.576896378,0.185,0,1,0.482390894,0,0
110,8,40303,"DOLE, Elizabeth Hanford",47,NORTH C,200,1.226060834,0.363,1,0,0.56241972,1,0
110,8,40304,"ALEXANDER, Lamar",54,TENNESS,200,1.774301952,0.323,0,0,0.571981926,0,0
110,8,40305,"CORNYN, John",49,TEXAS,200,2.469026226,0.497,1,0,0.615101919,0,0
110,8,40500,"SALAZAR, Kenneth Lee",62,COLORAD,100,-0.855389893,-0.223,0,0,0.523664265,0,0
110,8,40501,"MARTINEZ, Melquiades R. (Mel)",43,FLORIDA,200,0.969485432,0.333,1,0,0.525236796,0,0
110,8,40502,"OBAMA, Barack",21,ILLINOI,100,-1.443064941,-0.343,0,1,0.44791366,0,0
110,8,40700,"KLOBUCHAR, Amy",33,MINNESO,100,-1.474871245,-0.24,0,0,0.482390894,1,0
110,8,40701,"McCASKILL, Claire",34,MISSOUR,100,-0.670646652,-0.146,1,0,0.536197127,1,0
110,8,40702,"TESTER, Jon",64,MONTANA,100,-1.153327767,-0.214,0,0,0.605000762,0,0
110,8,40703,"CASEY, Robert (Bob), Jr.",14,PENNSYL,100,-1.076721609,-0.298,0,1,0.487417179,0,0
110,8,40704,"WHITEHOUSE, Sheldon",5,RHODE I,100,-1.409366554,-0.425,0,0,0.394224894,0,0
110,8,40705,"CORKER, Robert (Bob)",54,TENNESS,200,1.815005182,0.391,1,1,0.571981926,0,0
110,8,40706,"WEBB, James H. (Jim)",40,VIRGINI,100,-0.831711995,-0.169,1,1,0.541336967,0,1
110,8,40707,"BARRASSO, John A.",68,WYOMING,200,3.151884101,0.528,0,1,0.703127032,0,0
110,8,49300,"FEINSTEIN, Dianne",71,CALIFOR,100,-1.10836265,-0.263,0,0,0.449586795,1,0
110,8,49306,"HUTCHISON, Kathryn Ann Bailey (Kay)",49,TEXAS,200,1.70146908,0.356,0,0,0.615101919,1,0
110,8,49307,"BENNETT, Robert",67,UTAH,200,1.090551239,0.331,0,0,0.733464392,0,1
110,8,49308,"MURRAY, Patty",73,WASHING,100,-1.73001692,-0.342,0,0,0.463534623,1,0
110,8,49309,"FEINGOLD, Russell Dana",25,WISCONS,100,-1.849994126,-0.308,0,1,0.498081967,0,0
110,8,49700,"SESSIONS, Jefferson Beauregard III (Jeff)",41,ALABAMA,200,2.289433673,0.549,1,0,0.628977714,0,1
110,8,49702,"LANDRIEU, Mary L.",45,LOUISIA,100,-0.453378214,-0.203,0,0,0.573309413,1,0
110,8,49703,"COLLINS, Susan Margaret",2,MAINE,200,0.322345522,0.107,1,0,0.454169836,1,0
110,8,49704,"HAGEL, Charles Timothy (Chuck)",35,NEBRASK,200,0.002986465,0.344,0,1,0.668473373,0,1
110,8,49705,"SMITH, Gordon Harold",72,OREGON,200,0.106846277,0.192,0,0,0.478913742,0,0
110,8,49706,"ENZI, Michael B.",68,WYOMING,200,2.68914063,0.537,0,0,0.703127032,0,1
110,8,49901,"BAYH, Evan",22,INDIANA,100,-0.488297094,-0.158,1,0,0.604234762,0,0
110,8,49903,"VOINOVICH, George Victor",24,OHIO,200,0.625843712,0.239,0,1,0.510587607,0,0
110,8,94659,"SHELBY, Richard C.",41,ALABAMA,200,1.570552359,0.433,0,0,0.628977714,0,0
111,9,1366,"BYRD, Robert Carlyle",56,WEST VI,100,-1.905530414,-0.309,1,0,0.566737438,0,0
111,9,4812,"INOUYE, Daniel Ken",82,HAWAII,100,-1.780805791,-0.319,0,0,0.270062741,0,1
111,9,14009,"COCHRAN, William Thad",46,MISSISS,200,0.829761601,0.286,0,0,0.56641931,0,1
111,9,14203,"BAUCUS, Max Sieben",64,MONTANA,100,-1.001256148,-0.212,0,0,0.512313015,0,0
111,9,14213,"DODD, Christopher John",1,CONNECT,100,-2.029682028,-0.328,0,1,0.38681638,0,1
111,9,14226,"GRASSLEY, Charles Ernest",31,IOWA,200,1.22096124,0.341,0,0,0.451512222,0,0
111,9,14230,"HARKIN, Thomas Richard (Tom)",31,IOWA,100,-3.396793624,-0.351,0,0,0.451512222,0,1
111,9,14307,"LEAHY, Patrick Joseph",6,VERMONT,100,-3.858947322,-0.375,0,0,0.311008183,0,0
111,9,14400,"AKAKA, Daniel Kahikina",82,HAWAII,100,-2.104459994,-0.419,1,0,0.270062741,0,1
111,9,14440,"MIKULSKI, Barbara Ann",52,MARYLAN,100,-1.965700625,-0.37,0,0,0.370699127,1,0
111,9,14503,"HATCH, Orrin Grant",67,UTAH,200,1.306309925,0.382,0,0,0.645263614,0,0
111,9,14506,"LUGAR, Richard Green",22,INDIANA,200,0.284381394,0.304,0,1,0.494780466,0,1
111,9,14651,"NELSON, Clarence William (Bill)",43,FLORIDA,100,-0.907255385,-0.192,1,0,0.485823044,0,1
111,9,14661,"SNOWE, Olympia Jean",2,MAINE,200,0.555057415,0.091,0,0,0.41170475,1,0
111,9,14709,"LEVIN, Carl",23,MICHIGA,100,-2.336601813,-0.395,1,0,0.416286984,0,0
111,9,14812,"DORGAN, Byron Leslie",36,NORTH D,100,-0.921274927,-0.267,0,0,0.544287602,0,0
111,9,14826,"GREGG, Judd Alan",4,NEW HAM,200,0.495772622,0.429,0,0,0.451314589,0,0
111,9,14852,"ROBERTS, Charles Patrick (Pat)",32,KANSAS,200,1.431944741,0.415,0,0,0.576122758,0,1
111,9,14858,"SCHUMER, Charles Ellis (Chuck)",13,NEW YOR,100,-2.077321314,-0.35,0,0,0.364233189,0,0
111,9,14871,"WYDEN, Ronald Lee",72,OREGON,100,-1.862114768,-0.314,0,0,0.415862788,0,0
111,9,14910,"SPECTER, Arlen",14,PENNSYL,200,0.082475454,0.068,0,0,0.447702962,0,1
111,9,14912,"BINGAMAN, Jesse Francis, Jr. (Jeff)",66,NEW MEX,100,-2.125489873,-0.266,0,0,0.423351,0,1
111,9,14914,"LAUTENBERG, Frank Raleigh",12,NEW JER,100,-2.413663605,-0.382,0,0,0.421353701,0,1
111,9,14920,"KERRY, John Forbes",3,MASSACH,100,-2.198822912,-0.352,0,1,0.368029096,0,1
111,9,14921,"McCONNELL, Addison Mitchell (Mitch)",51,KENTUCK,200,1.717104204,0.404,0,0,0.582334276,0,1
111,9,14922,"ROCKEFELLER, John Davison IV (Jay)",56,WEST VI,100,-1.443479533,-0.326,0,0,0.566737438,0,0
111,9,15011,"BOXER, Barbara",71,CALIFOR,100,-1.443993949,-0.45,0,1,0.377215504,1,0
111,9,15015,"CARPER, Thomas Richard",11,DELAWAR,100,-1.270826847,-0.174,0,0,0.373618614,0,1
111,9,15021,"DURBIN, Richard Joseph",21,ILLINOI,100,-3.62602543,-0.365,0,0,0.37265736,0,0
111,9,15039,"McCAIN, John Sidney, III",61,ARIZONA,200,1.996509962,0.381,1,0,0.543139007,0,1
111,9,15054,"REID, Harry",65,NEVADA,100,-1.094914225,-0.276,0,0,0.436132619,0,0
111,9,15406,"BUNNING, James Paul David",51,KENTUCK,200,2.476152339,0.521,0,0,0.582334276,0,0
111,9,15408,"CARDIN, Benjamin Louis",52,MARYLAN,100,-2.341211792,-0.329,0,1,0.370699127,0,0
111,9,15424,"INHOFE, James Mountain",53,OKLAHOM,200,2.085046073,0.551,1,1,0.656450811,0,1
111,9,15425,"JOHNSON, Timothy Peter (Tim)",37,SOUTH D,100,-1.987486785,-0.25,0,0,0.542957072,0,0
111,9,15429,"KYL, Jon Llewellyn",61,ARIZONA,200,2.823943781,0.548,0,0,0.543139007,0,0
111,9,15501,"BOND, Christopher Samuel (Kit)",34,MISSOUR,200,0.847463231,0.31,0,0,0.500675791,0,0
111,9,15502,"CONRAD, Kent",36,NORTH D,100,-1.18370722,-0.296,0,0,0.544287602,0,0
111,9,15703,"KOHL, Herbert H.",25,WISCONS,100,-1.933346339,-0.256,0,0,0.429443218,0,1
111,9,15704,"LIEBERMAN, Joseph I.",1,CONNECT,100,-0.3664659,-0.205,1,0,0.38681638,0,0
111,9,20115,"KIRK, Mark Steven",21,ILLINOI,200,1.300945159,0.274,0,0,0.37265736,0,0
111,9,29142,"REED, John F. (Jack)",5,RHODE I,100,-2.419172242,-0.39,1,0,0.358018625,0,1
111,9,29147,"SANDERS, Bernard",6,VERMONT,328,-1.66142219,-0.511,0,0,0.311008183,0,0
111,9,29305,"LINCOLN, Blanche Lambert",42,ARKANSA,100,-0.559208963,-0.166,0,0,0.601717206,1,0
111,9,29345,"CRAPO, Michael Dean",63,IDAHO,200,2.001375204,0.507,0,0,0.630245898,0,0
111,9,29373,"MENENDEZ, Robert",12,NEW JER,100,-1.760911025,-0.36,0,1,0.421353701,0,0
111,9,29389,"BROWN, Sherrod",24,OHIO,100,-2.490898708,-0.439,0,0,0.476661592,0,0
111,9,29512,"CHAMBLISS, Saxby",44,GEORGIA,200,2.270365602,0.423,1,0,0.526283355,0,0
111,9,29523,"BROWNBACK, Sam Dale",32,KANSAS,200,1.307689024,0.439,0,0,0.576122758,0,0
111,9,29534,"WICKER, Roger F.",46,MISSISS,200,1.345263389,0.376,1,1,0.56641931,0,1
111,9,29537,"ENSIGN, John Eric",65,NEVADA,200,2.174972743,0.508,0,0,0.436132619,0,0
111,9,29548,"BURR, Richard M.",47,NORTH C,200,2.257884343,0.454,1,0,0.498340367,0,0
111,9,29555,"COBURN, Thomas Allen",53,OKLAHOM,200,3.681038458,0.782,0,0,0.656450811,0,0
111,9,29566,"GRAHAM, Lindsey O.",48,SOUTH C,200,1.526854109,0.409,1,0,0.545444292,0,1
111,9,29732,"STABENOW, Deborah Ann",23,MICHIGA,100,-1.844399306,-0.327,0,0,0.416286984,0,0
111,9,29754,"THUNE, John",37,SOUTH D,200,2.301505208,0.409,1,0,0.542957072,0,0
111,9,29906,"UDALL, Mark",62,COLORAD,100,-2.092212163,-0.353,1,0,0.454491923,0,0
111,9,29909,"ISAKSON, Johnny",44,GEORGIA,200,0.900322791,0.404,0,1,0.526283355,0,1
111,9,29918,"VITTER, David",45,LOUISIA,200,1.77698699,0.495,1,0,0.594571742,0,0
111,9,29924,"UDALL, Thomas (Tom)",66,NEW MEX,100,-2.455744532,-0.456,0,0,0.423351,0,0
111,9,29936,"DeMINT, James W.",48,SOUTH C,200,4.218105302,0.7,0,1,0.545444292,0,0
111,9,39310,"CANTWELL, Maria E.",73,WASHING,100,-2.063487731,-0.287,0,0,0.412479732,1,0
111,9,40103,"NELSON, Earl Benjamin (Ben)",35,NEBRASK,100,-0.405626863,-0.03,1,0,0.576090744,0,0
111,9,40300,"MURKOWSKI, Lisa",81,ALASKA,200,0.459568234,0.208,0,0,0.610647849,1,0
111,9,40301,"PRYOR, Mark",42,ARKANSA,100,-0.499590857,-0.199,0,0,0.601717206,0,0
111,9,40304,"ALEXANDER, Lamar",54,TENNESS,200,0.474474838,0.323,0,0,0.576314718,0,0
111,9,40305,"CORNYN, John",49,TEXAS,200,1.688412981,0.497,0,0,0.559359368,0,0
111,9,40501,"MARTINEZ, Melquiades R. (Mel)",43,FLORIDA,200,1.182652537,0.333,1,0,0.485823044,0,0
111,9,40700,"KLOBUCHAR, Amy",33,MINNESO,100,-0.950550491,-0.24,0,0,0.44770625,1,0
111,9,40701,"McCASKILL, Claire",34,MISSOUR,100,-0.504853382,-0.146,1,0,0.500675791,1,0
111,9,40702,"TESTER, Jon",64,MONTANA,100,-1.033832606,-0.214,0,0,0.512313015,0,0
111,9,40703,"CASEY, Robert (Bob), Jr.",14,PENNSYL,100,-1.202953167,-0.298,0,1,0.447702962,0,0
111,9,40704,"WHITEHOUSE, Sheldon",5,RHODE I,100,-2.308399252,-0.425,0,0,0.358018625,0,0
111,9,40705,"CORKER, Robert (Bob)",54,TENNESS,200,0.404269804,0.391,0,1,0.576314718,0,0
111,9,40706,"WEBB, James H. (Jim)",40,VIRGINI,100,-0.915544728,-0.169,1,1,0.468174156,0,1
111,9,40707,"BARRASSO, John A.",68,WYOMING,200,2.516253707,0.528,0,1,0.665620234,0,0
111,9,40900,"BEGICH, Mark",81,ALASKA,100,-1.815444388,-0.235,1,0,0.610647849,0,0
111,9,40902,"RISCH, James",63,IDAHO,200,1.969179364,0.631,0,0,0.630245898,0,0
111,9,40903,"BURRIS, Roland",21,ILLINOI,100,-2.904096213,-0.468,0,0,0.37265736,0,0
111,9,40904,"FRANKEN, Al",33,MINNESO,100,-2.301209224,-0.413,0,0,0.44770625,0,0
111,9,40905,"JOHANNS, Mike",35,NEBRASK,200,1.578557519,0.391,0,0,0.576090744,0,0
111,9,40906,"SHAHEEN, Jeanne",4,NEW HAM,100,-1.660619738,-0.273,0,0,0.451314589,1,0
111,9,40907,"HAGAN, Kay",47,NORTH C,100,-1.407784225,-0.202,0,0,0.498340367,1,0
111,9,40908,"MERKLEY, Jeff",72,OREGON,100,-1.60694522,-0.439,0,0,0.415862788,0,0
111,9,40909,"WARNER, Mark",40,VIRGINI,100,-1.655174902,-0.196,0,0,0.468174156,0,0
111,9,40911,"LEMIEUX, George S.",43,FLORIDA,200,1.559773654,0.34,0,0,0.485823044,0,0
111,9,40913,"BROWN, Scott P.",3,MASSACH,200,0.927670071,0.128,0,0,0.368029096,0,1
111,9,40915,"MANCHIN, Joe, III",56,WEST VI,100,-0.136391566,-0.062,0,0,0.566737438,0,0
111,9,40916,"COONS, Christopher A.",11,DELAWAR,100,-1.892134957,-0.282,0,0,0.373618614,0,0
111,9,49300,"FEINSTEIN, Dianne",71,CALIFOR,100,-1.319544962,-0.263,0,0,0.377215504,1,0
111,9,49306,"HUTCHISON, Kathryn Ann Bailey (Kay)",49,TEXAS,200,1.157448387,0.356,0,0,0.559359368,1,0
111,9,49307,"BENNETT, Robert",67,UTAH,200,0.419429857,0.331,0,0,0.645263614,0,1
111,9,49308,"MURRAY, Patty",73,WASHING,100,-2.020787726,-0.342,0,0,0.412479732,1,0
111,9,49309,"FEINGOLD, Russell Dana",25,WISCONS,100,-0.385770218,-0.308,0,1,0.429443218,0,0
111,9,49700,"SESSIONS, Jefferson Beauregard III (Jeff)",41,ALABAMA,200,2.582948942,0.549,1,0,0.608909028,0,1
111,9,49702,"LANDRIEU, Mary L.",45,LOUISIA,100,-0.942555703,-0.203,0,0,0.594571742,1,0
111,9,49703,"COLLINS, Susan Margaret",2,MAINE,200,0.365973017,0.107,1,0,0.41170475,1,0
111,9,49706,"ENZI, Michael B.",68,WYOMING,200,2.739263524,0.537,0,0,0.665620234,0,1
111,9,49901,"BAYH, Evan",22,INDIANA,100,-0.273761643,-0.158,1,0,0.494780466,0,0
111,9,49903,"VOINOVICH, George Victor",24,OHIO,200,0.178106948,0.239,0,0,0.476661592,0,0
111,9,94659,"SHELBY, Richard C.",41,ALABAMA,200,1.637392633,0.433,0,0,0.608909028,0,0
111,9,94910,"SPECTER, Arlen",14,PENNSYL,100,-1.510343731,-0.321,0,0,0.447702962,0,1
112,10,4812,"INOUYE, Daniel Ken",82,HAWAII,100,-1.077289786,-0.319,0,0,0.270062741,0,1
112,10,14009,"COCHRAN, William Thad",46,MISSISS,200,0.71307089,0.286,0,0,0.56641931,0,1
112,10,14203,"BAUCUS, Max Sieben",64,MONTANA,100,-1.47258811,-0.212,0,0,0.512313015,0,0
112,10,14226,"GRASSLEY, Charles Ernest",31,IOWA,200,1.794792428,0.341,0,0,0.451512222,0,0
112,10,14230,"HARKIN, Thomas Richard (Tom)",31,IOWA,100,-3.628305647,-0.351,0,0,0.451512222,0,1
112,10,14307,"LEAHY, Patrick Joseph",6,VERMONT,100,-3.067517076,-0.375,0,0,0.311008183,0,0
112,10,14400,"AKAKA, Daniel Kahikina",82,HAWAII,100,-2.867918504,-0.419,1,0,0.270062741,0,1
112,10,14440,"MIKULSKI, Barbara Ann",52,MARYLAN,100,-1.99463138,-0.37,0,0,0.370699127,1,0
112,10,14503,"HATCH, Orrin Grant",67,UTAH,200,1.398141703,0.382,0,0,0.645263614,0,0
112,10,14506,"LUGAR, Richard Green",22,INDIANA,200,0.449173718,0.304,0,1,0.494780466,0,1
112,10,14651,"NELSON, Clarence William (Bill)",43,FLORIDA,100,-1.224987654,-0.192,0,0,0.485823044,0,1
112,10,14661,"SNOWE, Olympia Jean",2,MAINE,200,0.184157665,0.091,0,0,0.41170475,1,0
112,10,14709,"LEVIN, Carl",23,MICHIGA,100,-1.52835409,-0.395,1,0,0.416286984,0,0
112,10,14806,"COATS, Daniel Ray",22,INDIANA,200,1.099515302,0.375,0,0,0.494780466,0,1
112,10,14852,"ROBERTS, Charles Patrick (Pat)",32,KANSAS,200,1.080838171,0.415,0,0,0.576122758,0,1
112,10,14858,"SCHUMER, Charles Ellis (Chuck)",13,NEW YOR,100,-2.370622075,-0.35,0,0,0.364233189,0,0
112,10,14871,"WYDEN, Ronald Lee",72,OREGON,100,-1.891465372,-0.314,0,0,0.415862788,0,0
112,10,14912,"BINGAMAN, Jesse Francis, Jr. (Jeff)",66,NEW MEX,100,-2.16700155,-0.266,0,0,0.423351,0,1
112,10,14914,"LAUTENBERG, Frank Raleigh",12,NEW JER,100,-2.949480751,-0.382,0,0,0.421353701,0,1
112,10,14920,"KERRY, John Forbes",3,MASSACH,100,-1.56906683,-0.352,0,1,0.368029096,0,1
112,10,14921,"McCONNELL, Addison Mitchell (Mitch)",51,KENTUCK,200,1.624029857,0.404,0,0,0.582334276,0,1
112,10,14922,"ROCKEFELLER, John Davison IV (Jay)",56,WEST VI,100,-2.074212701,-0.326,0,0,0.566737438,0,0
112,10,15011,"BOXER, Barbara",71,CALIFOR,100,-2.664707322,-0.45,0,1,0.377215504,1,0
112,10,15015,"CARPER, Thomas Richard",11,DELAWAR,100,-1.32351236,-0.174,0,0,0.373618614,0,1
112,10,15021,"DURBIN, Richard Joseph",21,ILLINOI,100,-3.023716277,-0.365,0,1,0.37265736,0,0
112,10,15039,"McCAIN, John Sidney, III",61,ARIZONA,200,1.308083721,0.381,1,0,0.543139007,0,1
112,10,15054,"REID, Harry",65,NEVADA,100,-2.232815934,-0.276,0,0,0.436132619,0,0
112,10,15408,"CARDIN, Benjamin Louis",52,MARYLAN,100,-2.725680099,-0.329,0,1,0.370699127,0,0
112,10,15424,"INHOFE, James Mountain",53,OKLAHOM,200,1.994997523,0.551,1,1,0.656450811,0,1
112,10,15425,"JOHNSON, Timothy Peter (Tim)",37,SOUTH D,100,-1.671273443,-0.25,0,0,0.542957072,0,0
112,10,15429,"KYL, Jon Llewellyn",61,ARIZONA,200,2.473421294,0.548,0,0,0.543139007,0,0
112,10,15502,"CONRAD, Kent",36,NORTH D,100,-1.429181936,-0.296,0,0,0.544287602,0,0
112,10,15703,"KOHL, Herbert H.",25,WISCONS,100,-1.539828378,-0.256,0,0,0.429443218,0,1
112,10,15704,"LIEBERMAN, Joseph I.",1,CONNECT,100,0.020352948,-0.205,1,0,0.38681638,0,0
112,10,20101,"BOOZMAN, John",42,ARKANSA,200,1.191355503,0.402,0,0,0.601717206,0,0
112,10,20115,"KIRK, Mark Steven",21,ILLINOI,200,0.723931603,0.274,0,0,0.37265736,0,0
112,10,20730,"HELLER, Dean",65,NEVADA,200,0.384897584,0.463,0,0,0.436132619,0,0
112,10,20735,"GILLIBRAND, Kirsten",13,NEW YOR,100,-2.665754484,-0.346,1,0,0.364233189,1,0
112,10,29142,"REED, John F. (Jack)",5,RHODE I,100,-2.494760869,-0.39,1,0,0.358018625,0,1
112,10,29147,"SANDERS, Bernard",6,VERMONT,328,-1.920878096,-0.511,0,0,0.311008183,0,0
112,10,29345,"CRAPO, Michael Dean",63,IDAHO,200,2.142042962,0.507,0,0,0.630245898,0,0
112,10,29373,"MENENDEZ, Robert",12,NEW JER,100,-1.969189376,-0.36,0,1,0.421353701,0,0
112,10,29386,"PORTMAN, Robert Jones (Rob)",24,OHIO,200,0.879975764,0.375,1,0,0.476661592,0,0
112,10,29389,"BROWN, Sherrod",24,OHIO,100,-3.726235399,-0.439,0,0,0.476661592,0,0
112,10,29512,"CHAMBLISS, Saxby",44,GEORGIA,200,1.478663972,0.423,1,0,0.526283355,0,0
112,10,29534,"WICKER, Roger F.",46,MISSISS,200,1.133589873,0.376,1,0,0.56641931,0,1
112,10,29537,"ENSIGN, John Eric",65,NEVADA,200,2.498483844,0.508,0,0,0.436132619,0,0
112,10,29548,"BURR, Richard M.",47,NORTH C,200,1.643436216,0.454,0,0,0.498340367,0,0
112,10,29555,"COBURN, Thomas Allen",53,OKLAHOM,200,2.300933448,0.782,0,0,0.656450811,0,0
112,10,29566,"GRAHAM, Lindsey O.",48,SOUTH C,200,0.562989304,0.409,1,0,0.545444292,0,1
112,10,29722,"MORAN, Jerry",32,KANSAS,200,1.146555532,0.412,0,0,0.576122758,0,0
112,10,29732,"STABENOW, Deborah Ann",23,MICHIGA,100,-1.397164579,-0.327,0,0,0.416286984,0,0
112,10,29735,"BLUNT, Roy",34,MISSOUR,200,0.374127495,0.431,0,0,0.500675791,0,0
112,10,29754,"THUNE, John",37,SOUTH D,200,1.484493294,0.409,0,0,0.542957072,0,0
112,10,29906,"UDALL, Mark",62,COLORAD,100,-2.289890879,-0.353,1,0,0.454491923,0,0
112,10,29909,"ISAKSON, Johnny",44,GEORGIA,200,1.187090463,0.404,0,1,0.526283355,0,1
112,10,29918,"VITTER, David",45,LOUISIA,200,1.924680477,0.495,1,0,0.594571742,0,0
112,10,29924,"UDALL, Thomas (Tom)",66,NEW MEX,100,-3.495070328,-0.456,0,1,0.423351,0,0
112,10,29935,"TOOMEY, Patrick Joseph",14,PENNSYL,200,1.470692824,0.629,0,0,0.447702962,0,0
112,10,29936,"DeMINT, James W.",48,SOUTH C,200,3.956699314,0.7,0,1,0.545444292,0,0
112,10,39310,"CANTWELL, Maria E.",73,WASHING,100,-1.779474664,-0.287,0,0,0.412479732,1,0
112,10,40103,"NELSON, Earl Benjamin (Ben)",35,NEBRASK,100,-0.713691649,-0.03,1,0,0.576090744,0,0
112,10,40300,"MURKOWSKI, Lisa",81,ALASKA,200,0.35890768,0.208,0,0,0.610647849,1,0
112,10,40301,"PRYOR, Mark",42,ARKANSA,100,-0.590950737,-0.199,0,0,0.601717206,0,0
112,10,40304,"ALEXANDER, Lamar",54,TENNESS,200,1.341767169,0.323,0,0,0.576314718,0,0
112,10,40305,"CORNYN, John",49,TEXAS,200,1.915947638,0.497,1,0,0.559359368,0,0
112,10,40700,"KLOBUCHAR, Amy",33,MINNESO,100,-1.804304871,-0.24,0,0,0.44770625,1,0
112,10,40701,"McCASKILL, Claire",34,MISSOUR,100,-0.502888309,-0.146,1,0,0.500675791,1,0
112,10,40702,"TESTER, Jon",64,MONTANA,100,-2.175657764,-0.214,0,0,0.512313015,0,0
112,10,40703,"CASEY, Robert (Bob), Jr.",14,PENNSYL,100,-1.655016893,-0.298,0,1,0.447702962,0,0
112,10,40704,"WHITEHOUSE, Sheldon",5,RHODE I,100,-2.031371919,-0.425,0,0,0.358018625,0,0
112,10,40705,"CORKER, Robert (Bob)",54,TENNESS,200,1.456778733,0.391,0,1,0.576314718,0,0
112,10,40706,"WEBB, James H. (Jim)",40,VIRGINI,100,-1.103179615,-0.169,1,1,0.468174156,0,1
112,10,40707,"BARRASSO, John A.",68,WYOMING,200,1.338410572,0.528,0,1,0.665620234,0,0
112,10,40900,"BEGICH, Mark",81,ALASKA,100,-2.436535696,-0.235,1,0,0.610647849,0,0
112,10,40902,"RISCH, James",63,IDAHO,200,2.54191202,0.631,0,0,0.630245898,0,0
112,10,40904,"FRANKEN, Al",33,MINNESO,100,-3.898904402,-0.413,0,0,0.44770625,0,0
112,10,40905,"JOHANNS, Mike",35,NEBRASK,200,0.832988176,0.391,0,0,0.576090744,0,0
112,10,40906,"SHAHEEN, Jeanne",4,NEW HAM,100,-1.720991929,-0.273,1,0,0.451314589,1,0
112,10,40907,"HAGAN, Kay",47,NORTH C,100,-1.115508679,-0.202,0,0,0.498340367,1,0
112,10,40908,"MERKLEY, Jeff",72,OREGON,100,-3.2620819,-0.439,0,0,0.415862788,0,0
112,10,40909,"WARNER, Mark",40,VIRGINI,100,-1.198317793,-0.196,0,0,0.468174156,0,0
112,10,40910,"BENNET, Michael F.",62,COLORAD,100,-1.576760051,-0.208,0,0,0.454491923,0,0
112,10,40913,"BROWN, Scott P.",3,MASSACH,200,-0.119653667,0.128,1,0,0.368029096,0,1
112,10,40915,"MANCHIN, Joe, III",56,WEST VI,100,-0.645565063,-0.062,1,0,0.566737438,0,0
112,10,40916,"COONS, Christopher A.",11,DELAWAR,100,-2.48485257,-0.282,0,1,0.373618614,0,0
112,10,41101,"BLUMENTHAL, Richard",1,CONNECT,100,-1.889620443,-0.419,1,0,0.38681638,0,1
112,10,41102,"RUBIO, Marco",43,FLORIDA,200,1.791531996,0.589,0,1,0.485823044,0,0
112,10,41104,"PAUL, Rand",51,KENTUCK,200,1.198550842,0.878,0,0,0.582334276,0,0
112,10,41106,"AYOTTE, Kelly",4,NEW HAM,200,1.241648656,0.351,1,0,0.451314589,1,0
112,10,41107,"HOEVEN, John",36,NORTH D,200,0.664655009,0.338,0,0,0.544287602,0,0
112,10,41110,"LEE, Mike",67,UTAH,200,1.624013116,0.921,0,1,0.645263614,0,0
112,10,41111,"JOHNSON, Ron",25,WISCONS,200,1.891166815,0.594,0,0,0.429443218,0,0
112,10,41112,"SCHATZ, Brian Emanuel",82,HAWAII,100,-2.441139347,-0.402,0,0,0.270062741,0,0
112,10,49300,"FEINSTEIN, Dianne",71,CALIFOR,100,-1.442091746,-0.263,0,0,0.377215504,1,0
112,10,49306,"HUTCHISON, Kathryn Ann Bailey (Kay)",49,TEXAS,200,1.443398346,0.356,0,0,0.559359368,1,0
112,10,49308,"MURRAY, Patty",73,WASHING,100,-1.775386521,-0.342,0,0,0.412479732,1,0
112,10,49700,"SESSIONS, Jefferson Beauregard III (Jeff)",41,ALABAMA,200,1.86833238,0.549,1,0,0.608909028,0,1
112,10,49702,"LANDRIEU, Mary L.",45,LOUISIA,100,-0.97304358,-0.203,0,0,0.594571742,1,0
112,10,49703,"COLLINS, Susan Margaret",2,MAINE,200,0.024521431,0.107,1,0,0.41170475,1,0
112,10,49706,"ENZI, Michael B.",68,WYOMING,200,1.798998666,0.537,0,0,0.665620234,0,1
112,10,94659,"SHELBY, Richard C.",41,ALABAMA,200,1.654164275,0.433,0,0,0.608909028,0,0
113,11,14009,"COCHRAN, William Thad",46,MS,200,1.208213037,0.286,0,0,0.558018992,0,1
113,11,14203,"BAUCUS, Max Sieben",64,MT,100,-1.661337082,-0.212,0,0,0.570342319,0,0
113,11,14226,"GRASSLEY, Charles Ernest",31,IA,200,1.477700918,0.341,0,0,0.470406481,0,0
113,11,14230,"HARKIN, Thomas Richard (Tom)",31,IA,100,-2.180383847,-0.351,0,0,0.470406481,0,1
113,11,14307,"LEAHY, Patrick Joseph",6,VT,100,-3.812093849,-0.375,0,0,0.317527412,0,0
113,11,14435,"MARKEY, Edward John",3,MA,100,-3.896932476,-0.5,0,1,0.382114326,0,1
113,11,14440,"MIKULSKI, Barbara Ann",52,MD,100,-2.892045734,-0.37,0,0,0.366782742,1,0
113,11,14503,"HATCH, Orrin Grant",67,UT,200,0.538225416,0.382,0,0,0.746261889,0,0
113,11,14651,"NELSON, Clarence William (Bill)",43,FL,100,-1.669408322,-0.192,1,0,0.495577479,0,1
113,11,14709,"LEVIN, Carl",23,MI,100,-1.338543506,-0.395,1,0,0.451994679,0,0
113,11,14806,"COATS, Daniel Ray",22,IN,200,1.12761882,0.375,0,0,0.552003746,0,1
113,11,14852,"ROBERTS, Charles Patrick (Pat)",32,KS,200,2.27187889,0.415,0,0,0.610603363,0,1
113,11,14858,"SCHUMER, Charles Ellis (Chuck)",13,NY,100,-2.849841164,-0.35,0,0,0.356990086,0,0
113,11,14871,"WYDEN, Ronald Lee",72,OR,100,-1.381185043,-0.314,0,0,0.437288328,0,0
113,11,14914,"LAUTENBERG, Frank Raleigh",12,NJ,100,-2.971935777,-0.382,0,0,0.410153053,0,1
113,11,14921,"McCONNELL, Addison Mitchell (Mitch)",51,KY,200,1.201377854,0.404,0,0,0.615427724,0,1
113,11,14922,"ROCKEFELLER, John Davison IV (Jay)",56,WV,100,-2.712447226,-0.326,0,0,0.636742976,0,0
113,11,15011,"BOXER, Barbara",71,CA,100,-3.186231065,-0.45,0,1,0.381271888,1,0
113,11,15015,"CARPER, Thomas Richard",11,DE,100,-1.795870108,-0.174,0,0,0.405530451,0,1
113,11,15021,"DURBIN, Richard Joseph",21,IL,100,-3.280116368,-0.365,0,1,0.414224766,0,0
113,11,15039,"McCAIN, John Sidney, III",61,AZ,200,0.261686963,0.381,1,1,0.546133802,0,1
113,11,15054,"REID, Harry",65,NV,100,-1.875157545,-0.276,0,0,0.465924578,0,0
113,11,15408,"CARDIN, Benjamin Louis",52,MD,100,-2.889671882,-0.329,0,1,0.366782742,0,0
113,11,15424,"INHOFE, James Mountain",53,OK,200,1.614877994,0.551,1,0,0.667723197,0,1
113,11,15425,"JOHNSON, Timothy Peter (Tim)",37,SD,100,-2.470273743,-0.25,0,0,0.592184991,0,0
113,11,20100,"FLAKE, Jeff",61,AZ,200,0.339767928,0.855,0,1,0.546133802,0,0
113,11,20101,"BOOZMAN, John",42,AR,200,1.646025965,0.402,0,0,0.621544054,0,0
113,11,20115,"KIRK, Mark Steven",21,IL,200,0.393274601,0.274,0,0,0.414224766,0,0
113,11,20707,"MURPHY, Christopher",1,CT,100,-2.248837713,-0.311,0,1,0.412269936,0,0
113,11,20713,"HIRONO, Mazie",82,HI,100,-2.33250814,-0.488,1,0,0.282961515,1,0
113,11,20717,"DONNELLY, Joe",22,IN,100,-0.93924008,-0.12,1,0,0.552003746,0,0
113,11,20730,"HELLER, Dean",65,NV,200,0.364631136,0.463,0,0,0.465924578,0,0
113,11,20735,"GILLIBRAND, Kirsten",13,NY,100,-3.662978498,-0.346,1,0,0.356990086,1,0
113,11,20930,"HEINRICH, Martin",66,NM,100,-2.061008065,-0.283,0,0,0.447047954,0,0
113,11,21173,"SCOTT, Tim",48,SC,200,2.050164796,0.669,0,0,0.553082547,0,0
113,11,29142,"REED, John F. (Jack)",5,RI,100,-2.595379964,-0.39,1,0,0.35983254,0,1
113,11,29147,"SANDERS, Bernard",6,VT,328,-1.668682021,-0.511,0,0,0.317527412,0,0
113,11,29345,"CRAPO, Michael Dean",63,ID,200,2.664408033,0.507,0,0,0.664213868,0,0
113,11,29373,"MENENDEZ, Robert",12,NJ,100,-2.645076272,-0.36,0,1,0.410153053,0,0
113,11,29386,"PORTMAN, Robert Jones (Rob)",24,OH,200,0.69978778,0.375,0,0,0.484854475,0,0
113,11,29389,"BROWN, Sherrod",24,OH,100,-3.489930419,-0.439,0,0,0.484854475,0,0
113,11,29512,"CHAMBLISS, Saxby",44,GA,200,1.249078133,0.423,1,0,0.539566491,0,0
113,11,29534,"WICKER, Roger F.",46,MS,200,1.177244074,0.376,1,0,0.558018992,0,1
113,11,29548,"BURR, Richard M.",47,NC,200,1.17379195,0.454,0,0,0.510340349,0,0
113,11,29555,"COBURN, Thomas Allen",53,OK,200,2.141099846,0.782,0,0,0.667723197,0,0
113,11,29566,"GRAHAM, Lindsey O.",48,SC,200,0.327530099,0.409,1,0,0.553082547,0,1
113,11,29722,"MORAN, Jerry",32,KS,200,1.519659725,0.412,0,0,0.610603363,0,0
113,11,29732,"STABENOW, Deborah Ann",23,MI,100,-2.096046085,-0.327,0,0,0.451994679,0,0
113,11,29735,"BLUNT, Roy",34,MO,200,1.066799678,0.431,1,0,0.547786668,0,0
113,11,29754,"THUNE, John",37,SD,200,1.480149226,0.409,0,0,0.592184991,0,0
113,11,29906,"UDALL, Mark",62,CO,100,-1.54850489,-0.353,1,0,0.472520117,0,0
113,11,29909,"ISAKSON, Johnny",44,GA,200,1.167986663,0.404,0,0,0.539566491,0,1
113,11,29918,"VITTER, David",45,LA,200,1.749132697,0.495,1,0,0.587468256,0,0
113,11,29924,"UDALL, Thomas (Tom)",66,NM,100,-3.243231372,-0.456,0,1,0.447047954,0,0
113,11,29935,"TOOMEY, Patrick Joseph",14,PA,200,1.167844889,0.629,0,0,0.47268066,0,0
113,11,29940,"BALDWIN, Tammy",25,WI,100,-2.547334754,-0.544,0,0,0.464836176,1,0
113,11,39310,"CANTWELL, Maria E.",73,WA,100,-2.194143781,-0.287,0,0,0.423717017,1,0
113,11,40300,"MURKOWSKI, Lisa",81,AK,200,-0.21902707,0.208,0,0,0.573152905,1,0
113,11,40301,"PRYOR, Mark",42,AR,100,-0.690927847,-0.199,0,0,0.621544054,0,0
113,11,40304,"ALEXANDER, Lamar",54,TN,200,0.538543826,0.323,0,0,0.603510715,0,0
113,11,40305,"CORNYN, John",49,TX,200,1.315696379,0.497,0,0,0.580078972,0,0
113,11,40700,"KLOBUCHAR, Amy",33,MN,100,-2.136940335,-0.24,0,0,0.460587735,1,0
113,11,40701,"McCASKILL, Claire",34,MO,100,-1.033410887,-0.146,1,0,0.547786668,1,0
113,11,40702,"TESTER, Jon",64,MT,100,-1.985013601,-0.214,0,0,0.570342319,0,0
113,11,40703,"CASEY, Robert (Bob), Jr.",14,PA,100,-1.750351411,-0.298,0,1,0.47268066,0,0
113,11,40703,"CASEY, Robert (Bob), Jr.",14,PA,100,-1.750351411,-0.298,0,1,0.47268066,0,0
113,11,40704,"WHITEHOUSE, Sheldon",5,RI,100,-2.704557683,-0.425,0,0,0.35983254,0,0
113,11,40705,"CORKER, Robert (Bob)",54,TN,200,0.471926952,0.391,0,1,0.603510715,0,0
113,11,40707,"BARRASSO, John A.",68,WY,200,1.934636242,0.528,0,1,0.71160634,0,0
113,11,40900,"BEGICH, Mark",81,AK,100,-1.685388419,-0.235,0,0,0.573152905,0,0
113,11,40902,"RISCH, James",63,ID,200,2.660019189,0.631,0,1,0.664213868,0,0
113,11,40904,"FRANKEN, Al",33,MN,100,-5.193436791,-0.413,0,0,0.460587735,0,0
113,11,40905,"JOHANNS, Mike",35,NE,200,1.041964101,0.391,0,0,0.611293903,0,0
113,11,40906,"SHAHEEN, Jeanne",4,NH,100,-1.49686789,-0.273,1,1,0.47166248,1,0
113,11,40907,"HAGAN, Kay",47,NC,100,-1.446070915,-0.202,1,0,0.510340349,1,0
113,11,40908,"MERKLEY, Jeff",72,OR,100,-3.033814542,-0.439,0,0,0.437288328,0,0
113,11,40909,"WARNER, Mark",40,VA,100,-1.169111982,-0.196,0,0,0.480326233,0,0
113,11,40910,"BENNET, Michael F.",62,CO,100,-1.929408289,-0.208,0,0,0.472520117,0,0
113,11,40915,"MANCHIN, Joe, III",56,WV,100,-0.436216804,-0.062,1,0,0.636742976,0,0
113,11,40916,"COONS, Christopher A.",11,DE,100,-2.347606466,-0.282,0,1,0.405530451,0,0
113,11,41101,"BLUMENTHAL, Richard",1,CT,100,-2.389730614,-0.419,1,0,0.412269936,0,1
113,11,41102,"RUBIO, Marco",43,FL,200,0.479980443,0.589,0,1,0.495577479,0,0
113,11,41104,"PAUL, Rand",51,KY,200,1.416505721,0.878,0,1,0.615427724,0,0
113,11,41106,"AYOTTE, Kelly",4,NH,200,0.291873986,0.351,1,0,0.47166248,1,0
113,11,41107,"HOEVEN, John",36,ND,200,0.570821224,0.338,0,0,0.601112083,0,0
113,11,41110,"LEE, Mike",67,UT,200,2.593056615,0.921,1,0,0.746261889,0,0
113,11,41111,"JOHNSON, Ron",25,WI,200,1.217536481,0.594,0,1,0.464836176,0,0
113,11,41112,"SCHATZ, Brian Emanuel",82,HI,100,-2.862000849,-0.402,0,0,0.282961515,0,0
113,11,41300,"KING, Angus Stanley, Jr.",2,ME,328,-1.222311887,-0.147,1,0,0.421400786,0,0
113,11,41301,"WARREN, Elizabeth",3,MA,100,-3.3364625,-0.744,0,0,0.382114326,1,0
113,11,41302,"FISCHER, Debra (Deb)",35,NE,200,1.282817988,0.473,1,0,0.611293903,1,0
113,11,41303,"HEITKAMP, Mary Kathryn (Heidi)",36,ND,100,-1.377363106,-0.128,0,0,0.601112083,1,0
113,11,41304,"CRUZ, Rafael Edward (Ted)",49,TX,200,2.242999642,0.88,1,0,0.580078972,0,0
113,11,41305,"KAINE, Timothy Michael (Tim)",40,VA,100,-1.752381373,-0.229,1,1,0.480326233,0,0
113,11,41307,"CHIESA, Jeffrey Scott",12,NJ,200,0.512186049,0.218,0,0,0.410153053,0,0
113,11,41309,"WALSH, John E.",64,MT,100,-1.718797914,-0.255,0,0,0.570342319,0,1
113,11,49300,"FEINSTEIN, Dianne",71,CA,100,-1.698033258,-0.263,0,0,0.381271888,1,0
113,11,49308,"MURRAY, Patty",73,WA,100,-1.968566869,-0.342,0,0,0.423717017,1,0
113,11,49700,"SESSIONS, Jefferson Beauregard III (Jeff)",41,AL,200,2.017693138,0.549,1,0,0.612162285,0,1
113,11,49700,"SESSIONS, Jefferson Beauregard III (Jeff)",41,AL,200,2.017693138,0.549,1,0,0.612162285,0,1
113,11,49702,"LANDRIEU, Mary L.",45,LA,100,-1.476910428,-0.203,0,0,0.587468256,1,0
113,11,49703,"COLLINS, Susan Margaret",2,ME,200,-0.146196279,0.107,0,0,0.421400786,1,0
113,11,49706,"ENZI, Michael B.",68,WY,200,1.819105946,0.537,0,0,0.71160634,0,1
113,11,94659,"SHELBY, Richard C.",41,AL,200,2.167764361,0.433,0,0,0.612162285,0,0
114,12,14009,"COCHRAN, William Thad",46,MS,200,0.651095375,0.286,0,0,0.558018992,0,1
114,12,14226,"GRASSLEY, Charles Ernest",31,IA,200,1.246826724,0.341,0,0,0.470406481,0,0
114,12,14307,"LEAHY, Patrick Joseph",6,VT,100,-4.345255204,-0.375,0,0,0.317527412,0,0
114,12,14435,"MARKEY, Edward John",3,MA,100,-5.845098599,-0.5,0,1,0.382114326,0,1
114,12,14440,"MIKULSKI, Barbara Ann",52,MD,100,-3.284845774,-0.37,0,0,0.366782742,1,0
114,12,14503,"HATCH, Orrin Grant",67,UT,200,0.793567915,0.382,0,0,0.746261889,0,0
114,12,14651,"NELSON, Clarence William (Bill)",43,FL,100,-1.134301898,-0.192,1,0,0.495577479,0,1
114,12,14806,"COATS, Daniel Ray",22,IN,200,0.712218468,0.375,0,0,0.552003746,0,1
114,12,14852,"ROBERTS, Charles Patrick (Pat)",32,KS,200,1.328983122,0.415,0,0,0.610603363,0,1
114,12,14858,"SCHUMER, Charles Ellis (Chuck)",13,NY,100,-3.454029562,-0.35,0,0,0.356990086,0,0
114,12,14871,"WYDEN, Ronald Lee",72,OR,100,-1.294176496,-0.314,0,0,0.437288328,0,0
114,12,14921,"McCONNELL, Addison Mitchell (Mitch)",51,KY,200,0.439447536,0.404,0,0,0.615427724,0,1
114,12,15011,"BOXER, Barbara",71,CA,100,-3.613863615,-0.45,0,1,0.381271888,1,0
114,12,15015,"CARPER, Thomas Richard",11,DE,100,-0.922323859,-0.174,0,0,0.405530451,0,1
114,12,15021,"DURBIN, Richard Joseph",21,IL,100,-3.294308722,-0.365,0,0,0.414224766,0,0
114,12,15039,"McCAIN, John Sidney, III",61,AZ,200,0.651297368,0.381,1,0,0.546133802,0,1
114,12,15054,"REID, Harry",65,NV,100,-4.242714113,-0.276,0,0,0.465924578,0,0
114,12,15408,"CARDIN, Benjamin Louis",52,MD,100,-2.471961572,-0.329,0,1,0.366782742,0,0
114,12,15424,"INHOFE, James Mountain",53,OK,200,1.630006642,0.551,1,0,0.667723197,0,1
114,12,20100,"FLAKE, Jeff",61,AZ,200,0.761732236,0.855,0,1,0.546133802,0,0
114,12,20101,"BOOZMAN, John",42,AR,200,1.164843768,0.402,0,0,0.621544054,0,0
114,12,20115,"KIRK, Mark Steven",21,IL,200,0.353753705,0.274,0,0,0.414224766,0,0
114,12,20146,"CAPITO, Shelley Moore",56,WV,200,0.830952531,0.258,0,0,0.636742976,1,1
114,12,20707,"MURPHY, Christopher",1,CT,100,-2.234116131,-0.311,0,1,0.412269936,0,0
114,12,20713,"HIRONO, Mazie",82,HI,100,-2.856399201,-0.488,1,0,0.282961515,1,0
114,12,20717,"DONNELLY, Joe",22,IN,100,-0.222021535,-0.12,1,0,0.552003746,0,0
114,12,20730,"HELLER, Dean",65,NV,200,0.669834159,0.463,0,0,0.465924578,0,0
114,12,20735,"GILLIBRAND, Kirsten",13,NY,100,-5.280961862,-0.346,1,0,0.356990086,1,0
114,12,20919,"CASSIDY, Bill",45,LA,200,1.245515792,0.453,0,0,0.587468256,0,0
114,12,20923,"PETERS, Gary C.",23,MI,100,-1.40595473,-0.232,0,0,0.451994679,0,0
114,12,20930,"HEINRICH, Martin",66,NM,100,-1.290105227,-0.283,1,0,0.447047954,0,0
114,12,21112,"GARDNER, Cory",62,CO,200,0.933536924,0.456,0,1,0.472520117,0,0
114,12,21166,"LANKFORD, James",53,OK,200,1.255260208,0.562,0,0,0.667723197,0,0
114,12,21173,"SCOTT, Tim",48,SC,200,1.455924215,0.669,0,0,0.553082547,0,0
114,12,21301,"COTTON, Tom",42,AR,200,1.664854621,0.619,1,0,0.621544054,0,1
114,12,21338,"DAINES, Steve",64,MT,200,1.528082496,0.529,0,0,0.570342319,0,1
114,12,29142,"REED, John F. (Jack)",5,RI,100,-3.158022863,-0.39,1,0,0.35983254,0,1
114,12,29147,"SANDERS, Bernard",6,VT,328,-2.506575592,-0.511,0,0,0.317527412,0,0
114,12,29345,"CRAPO, Michael Dean",63,ID,200,2.392721744,0.507,0,0,0.664213868,0,0
114,12,29373,"MENENDEZ, Robert",12,NJ,100,-2.24753407,-0.36,0,1,0.410153053,0,0
114,12,29386,"PORTMAN, Robert Jones (Rob)",24,OH,200,0.815367217,0.375,0,0,0.484854475,0,0
114,12,29389,"BROWN, Sherrod",24,OH,100,-4.311217372,-0.439,0,0,0.484854475,0,0
114,12,29534,"WICKER, Roger F.",46,MS,200,1.105586761,0.376,1,0,0.558018992,0,1
114,12,29548,"BURR, Richard M.",47,NC,200,0.916679422,0.454,0,0,0.510340349,0,0
114,12,29566,"GRAHAM, Lindsey O.",48,SC,200,0.435878435,0.409,1,0,0.553082547,0,1
114,12,29722,"MORAN, Jerry",32,KS,200,1.425859188,0.412,0,0,0.610603363,0,0
114,12,29735,"BLUNT, Roy",34,MO,200,1.035436225,0.431,0,0,0.547786668,0,0
114,12,29754,"THUNE, John",37,SD,200,0.952552405,0.409,0,0,0.592184991,0,0
114,12,29909,"ISAKSON, Johnny",44,GA,200,1.03873511,0.404,0,1,0.539566491,0,1
114,12,29918,"VITTER, David",45,LA,200,1.531092501,0.495,0,0,0.587468256,0,0
114,12,29924,"UDALL, Thomas (Tom)",66,NM,100,-2.509498839,-0.456,0,1,0.447047954,0,0
114,12,29935,"TOOMEY, Patrick Joseph",14,PA,200,1.024788352,0.629,0,0,0.47268066,0,0
114,12,29940,"BALDWIN, Tammy",25,WI,100,-3.231088013,-0.544,0,0,0.464836176,1,0
114,12,39310,"CANTWELL, Maria E.",73,WA,100,-1.176641843,-0.287,0,0,0.423717017,1,0
114,12,40300,"MURKOWSKI, Lisa",81,AK,200,0.5829229,0.208,0,0,0.573152905,1,0
114,12,40304,"ALEXANDER, Lamar",54,TN,200,0.627261619,0.323,0,0,0.603510715,0,0
114,12,40305,"CORNYN, John",49,TX,200,0.926808281,0.497,0,0,0.580078972,0,0
114,12,40700,"KLOBUCHAR, Amy",33,MN,100,-1.511067179,-0.24,0,0,0.460587735,1,0
114,12,40701,"McCASKILL, Claire",34,MO,100,-0.851197387,-0.146,1,0,0.547786668,1,0
114,12,40702,"TESTER, Jon",64,MT,100,-1.135248196,-0.214,0,0,0.570342319,0,0
114,12,40703,"CASEY, Robert (Bob), Jr.",14,PA,100,-1.720056834,-0.298,0,0,0.47268066,0,0
114,12,40704,"WHITEHOUSE, Sheldon",5,RI,100,-3.277986343,-0.425,0,0,0.35983254,0,0
114,12,40705,"CORKER, Robert (Bob)",54,TN,200,0.773272621,0.391,0,1,0.603510715,0,0
114,12,40707,"BARRASSO, John A.",68,WY,200,0.949000914,0.528,0,1,0.71160634,0,0
114,12,40902,"RISCH, James",63,ID,200,2.347917901,0.631,0,1,0.664213868,0,0
114,12,40904,"FRANKEN, Al",33,MN,100,-6.170070161,-0.413,0,0,0.460587735,0,0
114,12,40906,"SHAHEEN, Jeanne",4,NH,100,-1.306705556,-0.273,1,1,0.47166248,1,0
114,12,40908,"MERKLEY, Jeff",72,OR,100,-3.888276072,-0.439,0,0,0.437288328,0,0
114,12,40909,"WARNER, Mark",40,VA,100,-0.985822738,-0.196,0,0,0.480326233,0,0
114,12,40910,"BENNET, Michael F.",62,CO,100,-0.981659022,-0.208,0,0,0.472520117,0,0
114,12,40915,"MANCHIN, Joe, III",56,WV,100,-0.435415757,-0.062,1,0,0.636742976,0,0
114,12,40916,"COONS, Christopher A.",11,DE,100,-1.389817442,-0.282,0,1,0.405530451,0,0
114,12,41101,"BLUMENTHAL, Richard",1,CT,100,-1.966106654,-0.419,1,0,0.412269936,0,1
114,12,41102,"RUBIO, Marco",43,FL,200,1.119450452,0.589,0,1,0.495577479,0,0
114,12,41104,"PAUL, Rand",51,KY,200,1.034498522,0.878,0,1,0.615427724,0,0
114,12,41106,"AYOTTE, Kelly",4,NH,200,0.404863475,0.351,1,0,0.47166248,1,0
114,12,41107,"HOEVEN, John",36,ND,200,1.083842337,0.338,0,0,0.601112083,0,0
114,12,41110,"LEE, Mike",67,UT,200,1.220362264,0.921,1,0,0.746261889,0,0
114,12,41111,"JOHNSON, Ron",25,WI,200,0.784472803,0.594,0,1,0.464836176,0,0
114,12,41112,"SCHATZ, Brian Emanuel",82,HI,100,-2.979734103,-0.402,0,0,0.282961515,0,0
114,12,41300,"KING, Angus Stanley, Jr.",2,ME,328,-0.917468784,-0.147,1,0,0.421400786,0,0
114,12,41301,"WARREN, Elizabeth",3,MA,100,-5.280320136,-0.744,0,0,0.382114326,1,0
114,12,41302,"FISCHER, Debra (Deb)",35,NE,200,1.60235455,0.473,1,0,0.611293903,1,0
114,12,41303,"HEITKAMP, Mary Kathryn (Heidi)",36,ND,100,-0.577311903,-0.128,0,0,0.601112083,1,0
114,12,41304,"CRUZ, Rafael Edward (Ted)",49,TX,200,1.308190368,0.88,1,0,0.580078972,0,0
114,12,41305,"KAINE, Timothy Michael (Tim)",40,VA,100,-1.086192964,-0.229,1,1,0.480326233,0,0
114,12,41500,"SULLIVAN, Daniel Scott",81,AK,200,1.302922729,0.461,1,0,0.573152905,0,1
114,12,41501,"PERDUE, David Alfred, Jr.",44,GA,200,1.285110315,0.657,0,1,0.539566491,0,0
114,12,41502,"ERNST, Joni",31,IA,200,1.206516945,0.511,1,0,0.470406481,1,1
114,12,41503,"SASSE, Benjamin Eric",35,NE,200,1.480697822,0.832,0,0,0.611293903,0,0
114,12,41504,"TILLIS, Thomas Roland (Thom)",47,NC,200,1.012236713,0.44,1,0,0.510340349,0,0
114,12,41505,"ROUNDS, Marion Michael (Mike)",37,SD,200,0.742297457,0.382,1,0,0.592184991,0,0
114,12,49300,"FEINSTEIN, Dianne",71,CA,100,-1.13458166,-0.263,0,0,0.381271888,1,0
114,12,49308,"MURRAY, Patty",73,WA,100,-1.176148848,-0.342,0,0,0.423717017,1,0
114,12,49700,"SESSIONS, Jefferson Beauregard III (Jeff)",41,AL,200,1.245391524,0.549,1,0,0.612162285,0,1
114,12,49703,"COLLINS, Susan Margaret",2,ME,200,0.343543291,0.107,0,0,0.421400786,1,0
114,12,49706,"ENZI, Michael B.",68,WY,200,0.808413553,0.537,0,0,0.71160634,0,1
114,12,94659,"SHELBY, Richard C.",41,AL,200,1.302537019,0.433,0,0,0.612162285,0,0
